# Supplementary material for: Mechanical, Material and Morphological Adaptations of Healthy Lower Limb Tendons to Mechanical Loading: A Systematic Review and Meta-Analysis
Source: PubMed Central journal article supplement (PMC9474511; doi:10.1007/s40279-022-01695-y), 2022-06-03

## **Supplementary information for:**

**TITLE:** Mechanical, morphological and material adaptations of healthy lower limb tendons to mechanical loading: A systematic review and meta-analysis

**JOURNAL:** Sports Medicine

## **AUTHORS**

Lazarczuk, Stephanie L.<sup>1,2</sup> (ORCID: 0000-0001-8467-8799)

Maniar, Nirav<sup>3,4</sup> (ORCID: 0000-0002-6180-6003)

Opar, David A.<sup>3,4</sup> (ORCID: 0000-0002-8354-6353)

Duhig, Steven J.<sup>1,2</sup> (ORCID: 0000-0002-4014-7731)

Shield, Anthony<sup>5</sup> (ORCID: 0000-0002-0393-2466)

Barrett, Rod S.<sup>1,2</sup> (ORCID: 0000-0002-1784-1629)

Bourne, Matthew N.<sup>1,2</sup> (ORCID: 0000-0002-3374-4669)

## **AFFILIATIONS**

1. School of Health Sciences and Social Work, Griffith University, Gold Coast, Australia
2. Griffith Centre of Biomedical and Rehabilitation Engineering (GCORE), Menzies Health Institute Queensland, Griffith University, Gold Coast, Australia
3. School of Behavioural and Health Sciences, Australian Catholic University, Melbourne, Australia
4. Sports Performance, Recovery, Injury and New Technologies (SPRINT) Research Centre, Australian Catholic University, Melbourne, Australia
5. School of Exercise and Nutrition Sciences and Institute of Health and Biomedical Innovation, Queensland University of Technology, Brisbane, Australia

## **CORRESPONDING AUTHOR:**

Stephanie L. Lazarczuk – [stephanie.lazarczuk@griffithuni.edu.au](mailto:stephanie.lazarczuk@griffithuni.edu.au)

## S1. Search strategy and limits

| 1. Location                                                                                                                          | 2. Tendon Tissue              | 3. Trg Intervention                                                                                                                                                                                                                   | 4. Tendon Properties                                                                                                                                                                                                   | 5. NOT                                                                                                                                     |
|--------------------------------------------------------------------------------------------------------------------------------------|-------------------------------|---------------------------------------------------------------------------------------------------------------------------------------------------------------------------------------------------------------------------------------|------------------------------------------------------------------------------------------------------------------------------------------------------------------------------------------------------------------------|--------------------------------------------------------------------------------------------------------------------------------------------|
| OR<br><br>Lower limb<br>Hamstring*<br>Vastus lateralis<br>Quadricep*<br>Achilles<br>Patella*<br>Adductor*<br>Gastrocnemius<br>Soleus | OR<br><br>Tend*<br>Aponeuros* | OR<br><br>Strength*<br>Resistance<br>Run*<br>Sprint*<br>Power<br>Endurance<br>jump*<br>plyometric<br>ballistic<br>bound*<br>land*<br>stretch short*<br>SSC<br><br>AND<br><br>(Load* OR<br>Exercis* OR<br>Training OR<br>Intervention) | OR<br><br>Adapt*<br>Modulus<br>Stiffness<br>Cross-sectional<br>area<br>CSA<br>Morphology<br>Geometry<br>Material prop*<br>Mechanical prop*<br>Complian*<br>Stress<br>Strain<br>Deformation<br>Elongation<br>Plasticity | OR<br><br>ACL<br>Anterior cruciate<br>ligament<br>Tendinopath*<br>Tendinitis<br>Tendinosis<br>Rupture<br>Reconstruction<br>Graft<br>Injur* |

**Strategy:** The terms in each column were searched using the Boolean operator above them. These searches were combined using the following strategy for titles, abstracts: (1 AND 2 AND 3 AND 4) NOT 5

The following database keywords were also searched in addition to the title and abstract search above: PubMed = MeSH Terms; Scopus = Keywords; CINAHL = Subject Terms ; SportDISCUS = Subject Terms; EMBASE = Author key terms

**Limits applied:** Human(s), English

A manual check of reference lists of included studies and similar reviews was also conducted.

**S2.** Funnel plot for all studies reporting stiffness, demonstrating the standardised mean differences versus standard error, with result for Egger's test and adjusted SMDs based on the methods in Vevea & Woods (2005).

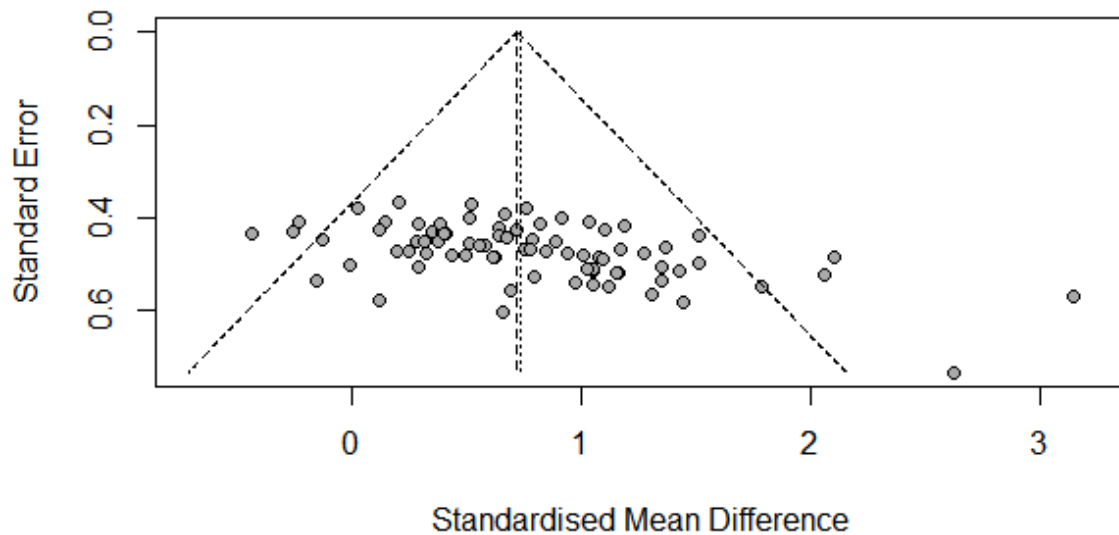

Egger's: intercept = 4.90,  $t = 4.89$ ,  $p < 0.001$

Original SMD: 0.74, 95% CI 0.62 – 0.86

Adjusted SMD – moderate bias: 0.63, 95% CI 0.50 – 0.76

Reference: Vevea JL, Woods CM. Publication bias in research synthesis: Sensitivity analysis using a priori weight functions. *Psychol Methods*. 2005;10(4):428–43.

**S3.** Funnel plot for all studies reporting modulus, demonstrating the standardised mean differences versus standard error, with result for Egger's test and adjusted SMDs based on the methods in Vevea & Woods (2005).

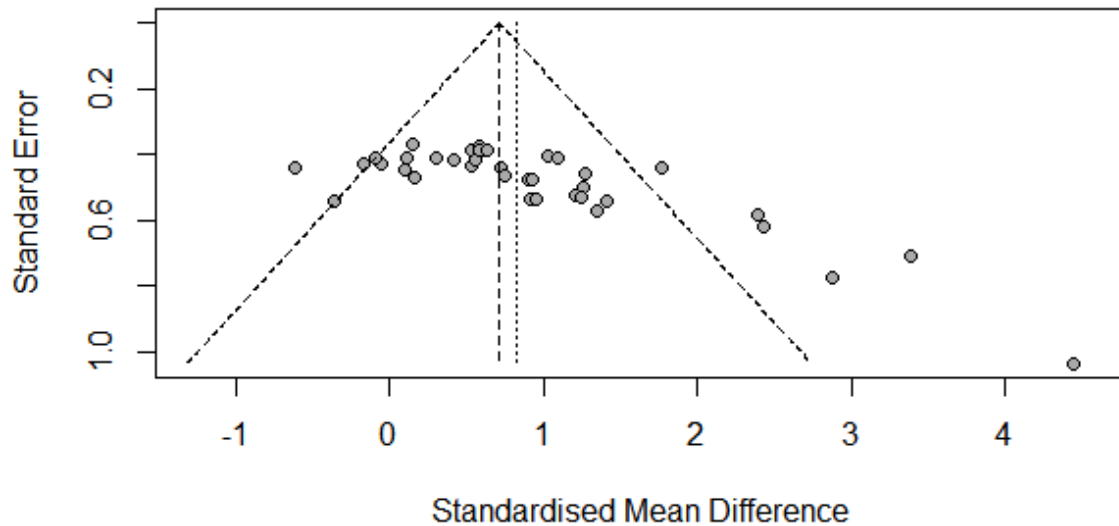

Eggers: intercept = 6.39,  $t = 5.99$ ,  $p < 0.001$

Original SMD: 0.82, 95%CI 0.58 – 1.07

Adjusted SMD – moderate bias: 0.65, 95%CI 0.39 – 0.92

Reference: Vevea JL, Woods CM. Publication bias in research synthesis: Sensitivity analysis using a priori weight functions. *Psychol Methods*. 2005;10(4):428–43.

**S4.** Funnel plot for all studies reporting cross-sectional area, demonstrating the standardised mean differences versus standard error, with result for Egger's test and adjusted SMDs based on the methods in Vevea & Woods (2005).

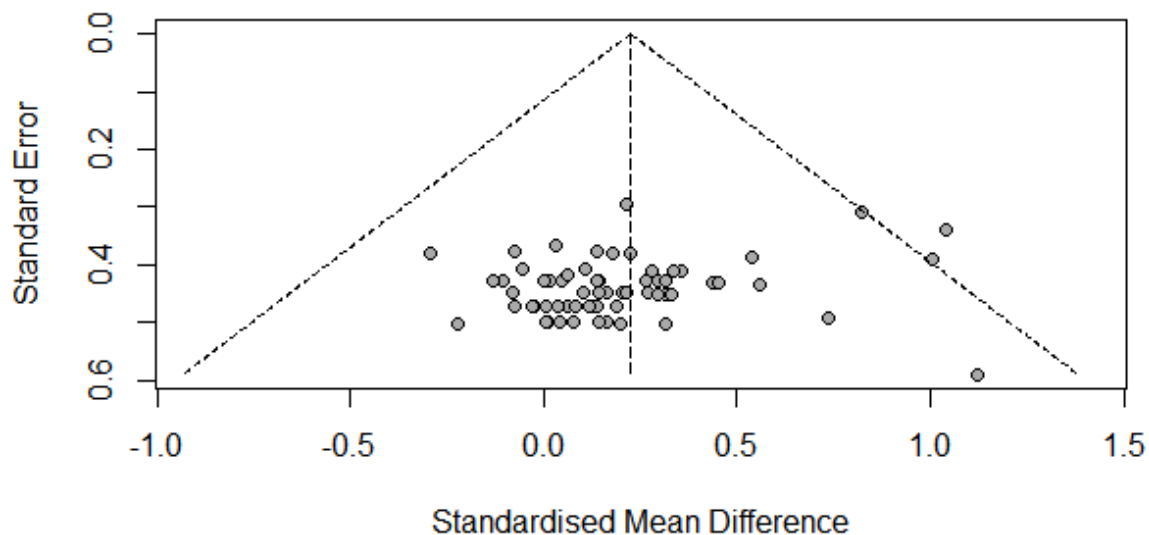

Eggers: intercept = -1.56,  $t = -2.27$ ,  $p = 0.026$

Original SMD: 0.22, 95% CI 0.12 – 0.33

Adjusted SMD – moderate: 0.14, 95% CI 0.04 – 0.24

Reference: Vevea JL, Woods CM. Publication bias in research synthesis: Sensitivity analysis using a priori weight functions. *Psychol Methods*. 2005;10(4):428–43.

## S5. Study characteristics (extended).

| Source                       | Participants                                        | Intervention                         | Tendon                                                                                                                                                                      | Tissue                                                                                                                                                                                                                                                                                                                                                                              |    |                                                                                                                                                                       |
|------------------------------|-----------------------------------------------------|--------------------------------------|-----------------------------------------------------------------------------------------------------------------------------------------------------------------------------|-------------------------------------------------------------------------------------------------------------------------------------------------------------------------------------------------------------------------------------------------------------------------------------------------------------------------------------------------------------------------------------|----|-----------------------------------------------------------------------------------------------------------------------------------------------------------------------|
| Author                       | Group                                               | Duration (weeks), Frequency per week | Exercise Parameters/Activity Descriptor                                                                                                                                     | Outcome measures - method                                                                                                                                                                                                                                                                                                                                                           |    |                                                                                                                                                                       |
| Albracht et al., 2013 [5]    | Exercise                                            | 14, 4                                | Unilat iso PF @ 5° DF (knee extended)<br>5 x 4 @ 90% MVC<br>3s contract, 3s rest                                                                                            | Stiffness: ramped iso PF MVC on isokinetic dynamometer with 2D US to assess elongation of distal GaM fascicles and aponeurosis<br>Modulus: not assessed<br>CSA: not assessed                                                                                                                                                                                                        | AT |                                                                                                                                                                       |
|                              | Control (recreative)                                |                                      | Continued own endurance training (running, ≥3 x p/wk)                                                                                                                       |                                                                                                                                                                                                                                                                                                                                                                                     |    |                                                                                                                                                                       |
| Arampatzis et al., 2007 [19] | Low strain limb                                     | 14, 4                                | Unilat iso PF @ 85° DF (knee extended)<br>Low strain: 5 x 7 @ 55% MVC = 2.85 ± 0.99% strain<br>High strain: 5 x 4 @ 90% MVC = 4.55 ± 1.38% strain<br>3s contract, 3s rest   | Stiffness: ramped iso PF MVC on isokinetic dynamometer with 2D US to assess elongation of distal GaM fascicles and aponeurosis<br>Modulus: calculated from linear regression of the tendon stress-tendon/aponeurosis strain relationship between 50-100% of maximum tendon stress<br>CSA: T1 MRI; 10% intervals along length                                                        | AT |                                                                                                                                                                       |
|                              | High strain limb                                    |                                      |                                                                                                                                                                             |                                                                                                                                                                                                                                                                                                                                                                                     |    |                                                                                                                                                                       |
|                              | Control *                                           |                                      |                                                                                                                                                                             |                                                                                                                                                                                                                                                                                                                                                                                     |    | No exercise intervention                                                                                                                                              |
| Arampatzis et al., 2010 [20] | Low strain limb                                     | 14, 4                                | Unilat iso PF @ 85° DF (knee extended)<br>Low strain: 5 x 20 @ 55% MVC @ 2.97 ± 0.47% strain<br>High strain: 5 x 12 @ 90% MVC @ 4.72 ± 1.08% strain<br>1s contract, 1s rest | Stiffness: ramped iso PF MVC on isokinetic dynamometer with 2D US to assess elongation of distal GaM fascicles and aponeurosis<br>Modulus: calculated from linear regression of the tendon stress-tendon/aponeurosis strain relationship between 50-100% of maximum tendon stress<br>CSA: T1 MRI; 10% intervals along length                                                        | AT |                                                                                                                                                                       |
|                              | High strain limb                                    |                                      |                                                                                                                                                                             |                                                                                                                                                                                                                                                                                                                                                                                     |    |                                                                                                                                                                       |
| Baptista et al., 2016 [95]   | Concentric limb                                     | 12, 2                                | Unilat con or ecc knee extension<br>Con: 2 x 10 @ ~80% 5RM<br>Ecc: 2 x 10 @ ~80% 5RM<br>0.5 s load acceptance + 3 s con or ecc                                              | Stiffness: not assessed<br>Modulus: not assessed<br>CSA: 2D US; 50% of distance between patella apex and tibial insertion                                                                                                                                                                                                                                                           | PT |                                                                                                                                                                       |
|                              | Eccentric limb                                      |                                      |                                                                                                                                                                             |                                                                                                                                                                                                                                                                                                                                                                                     |    |                                                                                                                                                                       |
| Bohm et al., 2014 [21]       | High strain rate limb & Reference protocol limb     | 14, 4                                | Unilat hops<br>High strain rate: 5 x 72 @ 90% MVC = 6.63 ± 1.24% maximum strain                                                                                             | Stiffness: iso PF MVC on isokinetic dynamometer with 2D US to assess elongation at GaM MTJ, calculated from linear regression of the tendon force-tendon elongation ratio between 50-100% maximum tendon force<br>Modulus: calculated from linear regression of the tendon stress-tendon strain relationship between 50-100% maximum stress<br>CSA: MRI, 10% intervals along length | AT |                                                                                                                                                                       |
|                              | Long strain duration limb & Reference protocol limb |                                      |                                                                                                                                                                             |                                                                                                                                                                                                                                                                                                                                                                                     |    | Unilat iso PF<br>Long strain duration: 5 x 12s @ 90% MVC = 6.94 ± 1.54% maximum strain                                                                                |
|                              | Control *                                           |                                      |                                                                                                                                                                             |                                                                                                                                                                                                                                                                                                                                                                                     |    | Reference protocol (completed on non-intervention limb):<br>Unilat iso PF @ 5° DF (knee extended): 5 x 4 (3s contract, 3s rest) @ 90% MVC<br>No exercise intervention |

|                             |                                     |         |                                                                                                                                                                                                 |                                                                                                                                                                                                                                                                                                                                                      |    |
|-----------------------------|-------------------------------------|---------|-------------------------------------------------------------------------------------------------------------------------------------------------------------------------------------------------|------------------------------------------------------------------------------------------------------------------------------------------------------------------------------------------------------------------------------------------------------------------------------------------------------------------------------------------------------|----|
| Bohm et al., 2021 [17]      | Intervention                        | 14, 3-4 | Unilat iso PF<br>5 x 4 @ 90% MVC<br>3 s contract, 3 s rest                                                                                                                                      | Stiffness: ramped iso PF MVC on isokinetic dynamometer with 2D US to assess elongation at GaM MTJ, calculated between 50-100% max tend force and strain<br>Modulus: not assessed<br>CSA: not assessed                                                                                                                                                | AT |
|                             | Control (rec active)                |         | Continued own endurance training (running, $\geq 2$ x p/wk)                                                                                                                                     |                                                                                                                                                                                                                                                                                                                                                      |    |
| Carroll et al., 2011 [62]   | Placebo (control = extracted group) | 12, 3   | Bilat con:ecc knee extension<br>3 x 10 @ 74 $\pm$ 1% 1RM (mean)<br>120s inter-set rest                                                                                                          | Stiffness: ramped iso MVC in seated, force recorded via strain-gauge, with 2D US used to assess displacement of patella and tibial insertions, calculated from final 10% of force-elongation curve<br>Modulus: calculated from final 10% of stress-strain curve<br>CSA: MRI; proximal, middle and distal regions                                     | PT |
|                             | Acetaminophen                       |         | Resistance training + 4000 mg acetaminophen (daily)                                                                                                                                             |                                                                                                                                                                                                                                                                                                                                                      |    |
|                             | Ibuprofen                           |         | Resistance training + 1200 mg ibuprofen (daily)                                                                                                                                                 |                                                                                                                                                                                                                                                                                                                                                      |    |
| Centner et al., 2019 [71]   | Heavy load (extracted group)        | 14, 3   | Standing and seated con:ecc PF<br>3 x 6-12 each exercise @ 70-85% 1RM<br>60 s inter-set rest<br>180 s inter-exercise rest                                                                       | Stiffness: ramped iso PF on isokinetic dynamometer with 2D US to assess elongation at GaM MTJ, calculated as the slope of the force-elongation curve between 50-80% MVC<br>Modulus: slope of the stress-strain curve between 50-80% MVC<br>CSA: 2D US at 25% length of AT length (measured calcaneal tuberosity to most distal aspect Gastrocnemius) | AT |
|                             | Low load + BFR                      |         | Exercises above @ 20% $\rightarrow$ 35% 1RM<br>First set: 1 x 30<br>Subsequent sets: 3 x 15<br>@ 50% limb occlusive pressure                                                                    |                                                                                                                                                                                                                                                                                                                                                      |    |
|                             | Control (rec active)                |         | No exercise intervention                                                                                                                                                                        |                                                                                                                                                                                                                                                                                                                                                      |    |
| Dalgaard et al., 2019 [104] | Non-contraceptive (extracted group) | 10, 3   | Con:ecc Knee extension and incline leg press<br>Wk 1: 3x12 @ 15RM $\rightarrow$ Wk 6-10: 4x10 @ 10RM.                                                                                           | Stiffness: not assessed<br>Modulus: not assessed<br>CSA: T1 MRI; proximal, middle and distal regions                                                                                                                                                                                                                                                 | PT |
|                             | Contraceptive                       |         | Exercises as above + oral contraceptives                                                                                                                                                        |                                                                                                                                                                                                                                                                                                                                                      |    |
| Duclay et al., 2009 [105]   | Eccentric training                  | 7, 3    | Unilat ecc calf raise<br>6 x 6 @ 120% concentric 1RM<br>180s inter-set rest<br>1 x session per week seated (calf machine) @ 90 knee° flexion, other sessions supine (sled)<br>18 sessions total | Stiffness: ramped iso PF MVC on isokinetic dynamometer in prone lying, with 2D US to assess elongation at GaM at distal myotendinous junction; assessed at 10% intervals of MVC torque<br>Modulus: not assessed<br>CSA: not assessed                                                                                                                 | AT |
|                             | Control (rec active)                |         | No exercise intervention                                                                                                                                                                        |                                                                                                                                                                                                                                                                                                                                                      |    |

|                            |                                                                                                  |       |                                                                                                                                                                                                                                                                           |                                                                                                                                                                                                                                                                                                                                                                       |    |
|----------------------------|--------------------------------------------------------------------------------------------------|-------|---------------------------------------------------------------------------------------------------------------------------------------------------------------------------------------------------------------------------------------------------------------------------|-----------------------------------------------------------------------------------------------------------------------------------------------------------------------------------------------------------------------------------------------------------------------------------------------------------------------------------------------------------------------|----|
| Eriksen et al., 2018 [63]  | Old heavy resistance<br><br>Very old heavy resistance<br><br>Control (sedentary)                 | 12, 3 | Knee con:ecc extension, leg press & leg curls<br>Wk 1: 3 x 12 @ 12RM (~70% 1RM) → Wk 10: 5 x 6 @ 6RM (~90% 1RM) → Wk 11: 3 x 6 @ 6RM → Wk 12: 2 x 6 @6RM<br><br>No exercise intervention                                                                                  | Stiffness: iso knee extension MVC in seated, force recorded via strain-gauge, with 2D US to assess elongation of PT between patella and tibial tendon insertions, calculated from the final 10% of force-elongation curve.<br>Modulus: calculated from final 10% of stress-strain curve (inferred from citations)<br>CSA: T1 MRI; proximal, middle and distal regions | PT |
| Eriksen et al., 2019 [64]  | Heavy resistance (extracted group)<br><br>Moderate resistance<br><br>Control (habitual activity) | 52, 3 | Knee con:ecc extension & leg press<br>6-8 wk of 3 x 15 @ ~50-60 %1RM.<br>8 wk blocks (1 wk inter-block break).<br>3 x 12 @ 70% → 3 x 6 @ 85% 1RM<br><br>Unsupervised, home-based circuit + elastic band activity<br><br>No exercise intervention                          | Stiffness: iso knee extension in seated, force recorded via dynamometer, with 2D US to assess elongation of PT between patella and tibial tendon insertions, calculated from the final 10% of the force-elongation curve<br>Modulus: calculated from the final 10% of the stress-strain curve<br>CSA: T1 MRI; proximal, middle and distal regions                     | PT |
| Farup et al., 2014 [106]   | Placebo Concentric limb<br><br>Placebo Eccentric limb<br><br>Whey hydrolysate (not extracted)    | 12, 3 | Unilat con:ecc knee extension<br>6 x 10-15RM → 8 x 6-10RM<br>Eccentric = 120% concentric load<br>Concentric = 2s, Eccentric = 2s<br>120s inter-set rest<br>33 sessions total<br><br>Exercise above + high-leucine whey protein hydrolysate + carbohydrate supplementation | Stiffness: not assessed<br>Modulus: not assessed<br>CSA: T1 MRI; proximal, middle and distal regions                                                                                                                                                                                                                                                                  | PT |
| Fletcher et al., 2010 [60] | Isometric<br><br>Control (active)                                                                | 8, 3  | Unilat iso PF<br>4 x 20s @ 80% MVC<br><br>R: 70-170 km/wk<br><br>Continued own endurance training (running, ≥6 x p/wk)                                                                                                                                                    | Stiffness: ramped iso PF MVC on isokinetic dynamometer in prone lying, with 2D US to assess elongation at GaM deep apon; assessed between 25-45%, 30-70% and 50-100% of MVC force<br>Modulus: not assessed<br>CSA: not assessed                                                                                                                                       | AT |
| Fouré et al., 2009 [107]   | Training/Jump<br><br>Control (rec active)                                                        | 8, 2  | SJ, CMJ, DJ, hurdles (DL to SL combos)<br>150-280 jumps per session<br>Progressive increase in number of jumps and heights over first 5 wk (detail n/s)<br><br>No exercise intervention – habitual exercise                                                               | Stiffness: iso PF MVC on isokinetic dynamometer in prone lying, with 2D US to assess elongation at Ga MTJ, calculated as the slope of force-elongation values<br>Modulus: not assessed<br>CSA: not assessed                                                                                                                                                           | AT |



|                             |                      |         |                                                                                                                                                                                                                                                                       |                                                                                                                                                                                                                                                                                                                    |    |
|-----------------------------|----------------------|---------|-----------------------------------------------------------------------------------------------------------------------------------------------------------------------------------------------------------------------------------------------------------------------|--------------------------------------------------------------------------------------------------------------------------------------------------------------------------------------------------------------------------------------------------------------------------------------------------------------------|----|
| Fouré et al., 2010 [49]     | Training/Jump        | 14, n/s | SJ, CMJ, DJ (@ 40cm, 60cm, or 80cm), hurdle hops/jumps. 200-600 jumps/session ≈ 6800 jumps total in programme 34 sessions total                                                                                                                                       | Stiffness: iso PF MVC on isokinetic dynamometer in prone lying, with 2D US to assess elongation at GaM MTJ, calculated as the slope of the force-elongation curve between 50-90% maximum force<br>Modulus: not assessed<br>CSA: 2D US, level with medial malleolus                                                 | AT |
|                             | Control (rec active) |         | No exercise intervention – habitual exercise                                                                                                                                                                                                                          |                                                                                                                                                                                                                                                                                                                    |    |
| Fouré et al., 2011 [50]     | Training/Jump        | 14, n/s | SJ, CMJ, DJ (@ 35cm, 50cm, 65cm), hurdle hops/jumps (40cm hurdle) 200-600 jumps/session<br>Progressive increase in number of exercises, jumps, and/or height (detail n/s) 34 sessions total                                                                           | Stiffness: not assessed<br>Modulus: not assessed<br>CSA: 2D US, level with medial malleolus                                                                                                                                                                                                                        | AT |
|                             | Control (rec active) |         | No exercise intervention – habitual exercise                                                                                                                                                                                                                          |                                                                                                                                                                                                                                                                                                                    |    |
| Fouré et al., 2012 [51]     | Jump                 | 14, n/s | SJ, CMJ, DJ (@ 40cm, 60cm, or 80cm), hurdle hops/jumps. 200-600 jumps/session ≈ 6800 jumps total in programme 34 sessions total                                                                                                                                       | Stiffness: not assessed<br>Modulus: not assessed<br>CSA: 2D US, level with medial malleolus                                                                                                                                                                                                                        | AT |
|                             | Control (rec active) |         | No exercise intervention – habitual exercise                                                                                                                                                                                                                          |                                                                                                                                                                                                                                                                                                                    |    |
| Fouré et al., 2013 [108]    | Eccentric            | 14, n/s | Unilat ecc heel drops + jump/landings from 35/50/65cm box (landing: unilateral or bilateral).<br>Progressive increase in number of PF actions or height of jump (increments n/s) 200-600 ecc actions/session ≈ 6800 contractions total in programme 34 sessions total | Stiffness: iso PF MVC on isokinetic dynamometer in prone lying, with 2D US to assess elongation at GaM MTJ, calculated as the slope of the force-elongation curve between 50-90% maximum force<br>Modulus: not assessed<br>CSA: 2D US, level with medial malleolus                                                 | AT |
|                             | Control (rec active) |         | No exercise intervention – habitual exercise                                                                                                                                                                                                                          |                                                                                                                                                                                                                                                                                                                    |    |
| Geremia et al., 2018 [72]   | Eccentric            | 12, 2   | Unilat ecc calf raises 3-5 x 10 @ 100% MVC 60 s inter-set rest 23 sessions total                                                                                                                                                                                      | Stiffness: ramped iso PF MVC on isokinetic dynamometer, with 2D US to assess elongation at GaM MTJ, calculated as the slope of the force-elongation curve from 50-100% MVC<br>Modulus: calculated as the slope of the stress-strain curve from 50-100% MVC<br>CSA: 2D US at 2, 4 and 6 cm from calcaneal insertion | AT |
|                             | Control (rec active) |         | No exercise intervention – habitual exercise                                                                                                                                                                                                                          |                                                                                                                                                                                                                                                                                                                    |    |
| Hirayama et al., 2017 [109] | Training             | 12, 3   | Unilat sled depth jumps 10 x 10 @ 100% 30 s inter-rep rest                                                                                                                                                                                                            | Stiffness: iso PF MVC on myometer in prone lying, with 2D US to assess displacement of GaM fascicle intersection at deep apon, calculated as the slop of the force-elongation curve from 50-100% peak torque<br>Modulus: not assessed<br>CSA: not assessed                                                         | AT |
|                             | Control (rec active) |         | No exercise intervention                                                                                                                                                                                                                                              |                                                                                                                                                                                                                                                                                                                    |    |

|                              |                                         |       |                                                                                                                                                              |                                                                                                                                                                                                                                                                                                                                                                                                                                    |               |
|------------------------------|-----------------------------------------|-------|--------------------------------------------------------------------------------------------------------------------------------------------------------------|------------------------------------------------------------------------------------------------------------------------------------------------------------------------------------------------------------------------------------------------------------------------------------------------------------------------------------------------------------------------------------------------------------------------------------|---------------|
| Houghton et al., 2013 [73]   | Plyometric                              | 8, 2  | Various unilat/bilat horizontal and lateral jump exercises. Varying intensity. 15 sessions total                                                             | Stiffness: ramped iso PF MVC on isokinetic dynamometer in prone lying, with 2D US to assess elongation at GaM MTJ, calculated as the gradient of linear regressions against the force-elongation curve between 0-40% and 50-90% MVC<br>Modulus: calculated as the gradient of linear regression against the stress-strain curve between 50-90% peak stress<br>CSA: 2D US, 2cm superior to line between medial and lateral malleoli | AT            |
|                              | Control (rec active)                    |       | No exercise intervention – habitual exercise                                                                                                                 |                                                                                                                                                                                                                                                                                                                                                                                                                                    |               |
| Kay et al., 2016 [110]       | Training                                | 6, 2  | Unilat PF @ 20° PF, sustained contraction with passive DF to 10° (i.e., 30° ROM) = induced ecc<br>5 x 12 @ 100%<br>1 s inter-rep rest<br>60 s inter-set rest | Stiffness: ramped iso PF MVC on isokinetic dynamometer, with 2D US to assess elongation at GaM MTJ, calculated as change in PF moment from 50-90% MVC divided by elongation<br>Modulus: not assessed<br>CSA: not assessed                                                                                                                                                                                                          | AT            |
| Kongsgaard et al., 2007 [65] | Heavy Resistance limb                   | 12, 3 | Unilat con:ecc knee extension<br>Heavy: 10 x 8 @ 70% 1RM<br>180 s inter-set rest                                                                             | Stiffness: ramped iso knee extension MVC using strain gauge, with 2D US to assess elongation of PT between patella and tibial insertions, calculated in final 10% of force-elongation curve<br>Modulus: calculated in the final 10% of stress-strain curve<br>CSA: T1 MRI; proximal, middle and distal regions                                                                                                                     | PT            |
|                              | Light Resistance limb                   |       | Light: 10 x 36 @ equivalent load (not reported)<br>30 s inter-set rest                                                                                       |                                                                                                                                                                                                                                                                                                                                                                                                                                    |               |
| Kubo et al., 2001 [51]       | Short duration limb                     | 12, 4 | Unilat iso knee extension @ 80° knee flexion<br>Short duration: 3 x 50 rapid contraction @ 70% MVC<br>2 s inter-rep rest<br>60 s inter-set rest              | Stiffness: ramped iso knee extension MVC on isokinetic dynamometer, with 2D US to assess elongation of VL apon at 50% length of thigh visualising fascicle insertion into apon, calculated as the slope of linear regression over 50-100% MVC<br>Modulus: not assessed<br>CSA: T1 MRI, prone lying, immediate superior to patella and 10mm from patella                                                                            | QT<br>VL apon |
|                              | Long duration limb                      |       | Long duration: 4 x 20s @ 70% MVC<br>60 s inter-rep rest.                                                                                                     |                                                                                                                                                                                                                                                                                                                                                                                                                                    |               |
| Kubo et al., 2001 [52]       | Isometric                               | 12, 4 | Unilat iso knee extension @ 80° knee flexion<br>4 x 20s @ 70% MVC<br>60 s inter-rep rest                                                                     | Stiffness: ramped iso knee extension MVC on isokinetic dynamometer, with 2D US to assess elongation of VL apon at 50% length of thigh visualising fascicle insertion into apon, calculated as the slope of linear regression over 50-100% MVC<br>Modulus: not assessed<br>CSA: T1 MRI, prone lying, immediate superior to patella and 10mm from patella                                                                            | QT<br>VL Apon |
| Kubo et al., 2002 [111]      | Resistance Training (extracted group)   | 8, 4  | Unilat con:ecc PF on leg press<br>5 x 10 @ 70% 1RM                                                                                                           | Stiffness: ramped iso PF MVC on isokinetic dynamometer, with 2D US 30% length of lower leg (proximal to distal) to assess displacement of GaM fascicle intersection with deep apon, calculated as the slope of linear regression over 50-100% MVC<br>Modulus: not assessed<br>CSA: T1 MRI, immediately superior to calcaneus and 10mm from calcaneus                                                                               | AT            |
|                              | Resistance training + static stretching |       | Exercises above + 5 x 45 s stretches for PF group                                                                                                            |                                                                                                                                                                                                                                                                                                                                                                                                                                    |               |
| Kubo et al., 2006 [112]      | Isometric                               | 12, 4 | Bilat iso leg press<br>10 x 15s @ 70% MVC<br>60 s inter-set rest                                                                                             | Stiffness: ramped iso knee extension MVC on isokinetic dynamometer, with 2D US to assess elongation of VL apon at 50% length of thigh visualising fascicle insertion into apon and PT at apex of patella, calculated as the slope of linear regression over 50-100% MVC<br>Modulus: not assessed<br>CSA: T1 MRI; assessed 10, 20 and 30 mm inferior to patella                                                                     | PT<br>VL Apon |
|                              | Control (rec active)                    |       | No exercise intervention                                                                                                                                     |                                                                                                                                                                                                                                                                                                                                                                                                                                    |               |

|                            |                                |       |                                                                                                                              |                                                                                                                                                                                                                                                                                                                                                             |               |
|----------------------------|--------------------------------|-------|------------------------------------------------------------------------------------------------------------------------------|-------------------------------------------------------------------------------------------------------------------------------------------------------------------------------------------------------------------------------------------------------------------------------------------------------------------------------------------------------------|---------------|
| Kubo et al.,<br>2006 [113] | Short length limb              | 12, 4 | Unilat iso knee extension<br>Short: 6 x 15s @ 50-70% MVC @ 50° knee flexion<br>30 s inter-rep rest                           | Stiffness: ramped iso knee extension MVC on isokinetic dynamometer, with 2D US to assess elongation of VL apon at 50% length of thigh visualising fascicle insertion into apon, calculated as the slope of linear regression over 50-100% MVC<br>Modulus: not assessed<br>CSA: T1 MRI, prone lying, immediate superior to patella and 10mm from patella     | QT<br>VL Apon |
|                            | Long length limb               |       | Long: 6 x 15s @ 50-70% MVC @ 100° knee flexion<br>30 s inter-rep rest.                                                       |                                                                                                                                                                                                                                                                                                                                                             |               |
| Kubo et al.,<br>2006 [96]  | High load<br>(extracted group) | 12, 3 | Unilat con:ecc knee extension<br>0 - 90° knee flexion<br>4 x 10 @ 80% 1RM<br>Con = 1 s, Ecc = 3 s<br>Inter-set rest = 60 s   | Stiffness: ramped iso knee extension MVC on isokinetic dynamometer, with 2D US to assess elongation of VL apon at 50% length of thigh visualising fascicle insertion into apon and PT at apex of patella, calculated as the slope of linear regression over 50-100% MVC<br>Modulus: not assessed<br>CSA: 2D US; assessed at 25, 50 and 75% length of the PT | PT<br>VL Apon |
|                            | BFR                            |       | Exercise above @ 20% 1RM<br>4 sets: 25/18/15/12 reps                                                                         |                                                                                                                                                                                                                                                                                                                                                             |               |
| Kubo et al.,<br>2007 [85]  | Plyometric/ Jump<br>limb       | 12, 4 | Unilat Hop and DJ from 20cm;<br>Each exercise: 5 x 10 @ 40% 1RM PF<br>30 s inter-set rest                                    | Stiffness: ramped iso PF MVC on isokinetic dynamometer, with 2D US to assess elongation at GaM MTJ, calculated as the slope of linear regression over 50-100% MVC<br>Modulus: not assessed<br>CSA: T1 MRI, immediately superior to calcaneus and 10mm from calcaneus                                                                                        | AT            |
|                            | Weight training<br>limb        |       | Unilat con:ecc 5 x 10 PF @ 80% 1RM<br>Con = 1 s, Ecc = 3 s<br>60 s inter-set rest                                            |                                                                                                                                                                                                                                                                                                                                                             |               |
| Kubo et al.,<br>2009 [114] | Isometric                      | 12, 4 | Unilat iso knee extension @ 90° knee flexion<br>10 x 15s @ 70% MVC<br>30 s inter-rep rest                                    | Stiffness: ramped iso knee extension MVC on isokinetic dynamometer, with 2D US to assess elongation of VL apon at 50% length of thigh visualising fascicle insertion into apon and PT at apex of patella, calculated as the slope of linear regression over 50-100% MVC<br>Modulus: not assessed<br>CSA: 2D US; assessed at 25, 50 and 75% length of the PT | PT<br>VL Apon |
|                            | Con:Ecc                        |       | Unilat con:ecc knee extension between 0-90°<br>5 x 10 @ 80% 1RM<br>Con = ~1s, Ecc = ~3s<br>60 s inter-set rest               |                                                                                                                                                                                                                                                                                                                                                             |               |
| Kubo et al.,<br>2010 [115] | PF                             | 12, 4 | Unilat con:ecc PF<br>5 x 10 @ 80% 1RM<br>60 s inter-set rest<br>Con = 1 s, Ecc = 3 s                                         | Stiffness: ramped iso knee extension and PF MVC on isokinetic dynamometer, with 2D US to assess elongation at the patella apex and GaM MTJ<br>Modulus: not assessed<br>CSA: T1 MRI; assessed immediately inferior to the patella and 20mm distal to patella, and immediately superior to calcaneus and 10mm superior to calcaneus                           | PT<br>AT      |
|                            | Knee extension                 |       | Unilat con:ecc knee extension between 0-90°<br>5 x 10 @ 80% 1RM<br>Concentric = ~1 s, Eccentric: ~3 s<br>60 s inter-set rest |                                                                                                                                                                                                                                                                                                                                                             |               |

|                               |                      |       |                                                                                                                                   |                                                                                                                                                                                                                                                                                                                                |               |
|-------------------------------|----------------------|-------|-----------------------------------------------------------------------------------------------------------------------------------|--------------------------------------------------------------------------------------------------------------------------------------------------------------------------------------------------------------------------------------------------------------------------------------------------------------------------------|---------------|
| Kubo et al.,<br>2010 [88]     | Isometric            | 12, 4 | Unilat iso knee extension @ 90° knee flexion<br>10 x 15 s @ 70% MVC<br>30 s inter-rep rest                                        | Stiffness: ramped iso knee extension MVC on isokinetic dynamometer, with 2D US to assess elongation of VL upon at 50% length of thigh visualising fascicle insertion into upon, calculated as the slope of linear regression over 50-100% MVC<br>Modulus: not assessed<br>CSA: T1 MRI; 10, 20 and 30 mm inferior to patella    | PT<br>VL Upon |
|                               | Control (rec active) |       | No exercise intervention                                                                                                          |                                                                                                                                                                                                                                                                                                                                |               |
| Kubo et al.,<br>2012 [89]     | Isometric            | 12, 4 | Unilat iso PF @ 0° DF (knee extended)<br>15 x 15 s @ 80% MVC<br>30 s inter-rep rest.                                              | Stiffness: ramped iso PF MVC on isokinetic dynamometer, with 2D US to assess elongation at GaM MTJ, calculated as the slope of linear regression over 50-100% MVC<br>Modulus: not assessed<br>CSA: T1 MRI; assessed every three images                                                                                         | AT            |
|                               | Control (rec active) |       | No exercise intervention                                                                                                          |                                                                                                                                                                                                                                                                                                                                |               |
| Kubo et al.,<br>2017 [86]     | Isometric            | 12, 3 | Unilat iso PF (prone lying) @ 0° DF (knee extended)<br>10 x 15 s @ 80% MVC<br>30 s inter-rep rest                                 | Stiffness: ramped iso PF MVC on isokinetic dynamometer, with 2D US to assess elongation at GaM visualising fascicle intersection at deep upon at 30% lower leg length (proximal to distal), calculated as the slope of linear regression over 50-100% MVC<br>Modulus: not assessed<br>CSA: 2D US; level with lateral malleolus | AT            |
|                               | Plyometric           |       | Unilat hops/drop jumps on sled<br>5 x 10 @ 40%<br>30 s inter-set rest                                                             |                                                                                                                                                                                                                                                                                                                                |               |
| Kubo et al.,<br>2017 [116]    | Concentric           | 12, 3 | Unilat con or ecc knee extn between 0-90° flexion<br>5 x 10 @ 80% 1RM                                                             | Stiffness: ramped iso knee extension MVC on isokinetic dynamometer, with 2D US to assess elongation between patella and tibial insertions, calculated as the slope of linear regression over 50-100% MVC<br>Modulus: not assessed<br>CSA: 2D US; assessed at 50% PT length                                                     | PT            |
|                               | Eccentric            |       | Con = 1 s (unloaded ecc = 3 s)<br>Ecc = 3 s (unloaded con = 1 s)<br>60 s inter-set rest                                           |                                                                                                                                                                                                                                                                                                                                |               |
|                               | Control (rec active) |       | No exercise intervention                                                                                                          |                                                                                                                                                                                                                                                                                                                                |               |
| Laurent et al.,<br>2020 [117] | Knee extended        | 10, 2 | Bilat vertical hop and DJ variations (30-40cm)<br>6-8 exercises per session x 10 repetitions per exercise<br>~90 s inter-set rest | Stiffness: iso PF MVC using ankle ergometer with force transducer, with 2D US to assess elongation at GaM MTJ, calculated as slope of torque-elongation curve between 20-80% MVC<br>Modulus: not assessed<br>CSA: 2D US; 4cm superior to AT calcaneal insertion                                                                | AT            |
|                               | Knee flexed          |       | ~180 s inter-exercise rest<br>200 → 400 foot contacts p/wk in either knee extended or flexed position                             |                                                                                                                                                                                                                                                                                                                                |               |
|                               | Control (rec active) |       | No exercise intervention                                                                                                          |                                                                                                                                                                                                                                                                                                                                |               |

|                             |                                      |       |                                                                                                                                                                                                                                                                                                                                                                          |                                                                                                                                                                                                                                                                                                                                                                                                                                                                                                                                |               |
|-----------------------------|--------------------------------------|-------|--------------------------------------------------------------------------------------------------------------------------------------------------------------------------------------------------------------------------------------------------------------------------------------------------------------------------------------------------------------------------|--------------------------------------------------------------------------------------------------------------------------------------------------------------------------------------------------------------------------------------------------------------------------------------------------------------------------------------------------------------------------------------------------------------------------------------------------------------------------------------------------------------------------------|---------------|
| Malliaras et al., 2013 [61] | Concentric                           | 12, 3 | 4 x 7-8 @ 80% con:ecc 1RM knee extension<br>Con phase = unilat, Ecc phase = bilat                                                                                                                                                                                                                                                                                        | Stiffness: iso knee extension MVC on isokinetic dynamometer, with 2D US to assess elongation at patella apex, calculated between 50-75% and 75-100% maximum torque<br>Modulus: calculated by multiplying stiffness between 50-75% and 75-100% MVC by ratio of tendon length to CSA<br>CSA: 2D US; 50% length of PT                                                                                                                                                                                                             | PT            |
|                             | Eccentric                            |       | 4 x 12-15 @ 80% con:ecc 1RM knee extension<br>Con phase = bilat, Ecc phase = unilat<br>5 s ecc through 0-90° knee flexion                                                                                                                                                                                                                                                |                                                                                                                                                                                                                                                                                                                                                                                                                                                                                                                                |               |
|                             | High load eccentric                  |       | 4 x 7-8 @ 80% ecc 1RM knee extension<br>Con phase = bilat, Ecc phase = unilat<br>5 s ecc through 0-90° knee flexion                                                                                                                                                                                                                                                      |                                                                                                                                                                                                                                                                                                                                                                                                                                                                                                                                |               |
|                             | Control *                            |       | No exercise intervention                                                                                                                                                                                                                                                                                                                                                 |                                                                                                                                                                                                                                                                                                                                                                                                                                                                                                                                |               |
| Massey et al., 2018 [66]    | Explosive contraction                | 12, 3 | Unilat iso knee extension<br>Explosive: 4 x 10 @ >80% maximal torque<br>5 s inter-rep rest<br>120 s inter-set rest                                                                                                                                                                                                                                                       | Stiffness: ramped iso knee extension MVC using strain gauge, with 2D US to assess elongation of VL upon at 50% length of the thigh by visualising fascicle intersection with deep upon and of PT via displacement of patella and tibial insertions, calculated as slope of force-elongation curve over 70-80% MVT<br>Modulus: calculated as slope of stress-strain curve over stress range corresponding to 70-80% MVT<br>CSA: T1 MRI; contiguous images from 2cm superior to patella apex to 2cm inferior to tibial insertion | PT<br>VL upon |
|                             | Sustained contraction                |       | Sustained: 4 x 10 @ 75% maximal torque<br>Contraction: 1 s ramp, 3 s plateau<br>2 s inter-rep rest<br>120 s inter-set rest                                                                                                                                                                                                                                               |                                                                                                                                                                                                                                                                                                                                                                                                                                                                                                                                |               |
|                             | Control *                            |       | No exercise intervention – habitual exercise                                                                                                                                                                                                                                                                                                                             |                                                                                                                                                                                                                                                                                                                                                                                                                                                                                                                                |               |
| McMahon et al., 2013 [67]   | Short range                          | 8, 3  | 4 x con:ecc exercises p/session (2 x squat variations, 1 x machine, 1 x Sampson chair), from: exercises = barbell back squat, Bulgarian split squat, leg press, leg extension, dumbbell lunge, static Sampson chair<br>3 x 10 → 4 x 8<br>Short = 0-50° knee flexion @ 80% 1RM<br>Long range = 40-90° knee flexion @ 55% 1RM<br>Full range = 0-90° knee flexion @ 80% 1RM | Stiffness: ramped iso knee extension on isokinetic dynamometer, with 2D US to assess elongation at the patella apex, calculated as slope of force-elongation curve of 10% MVC intervals<br>Modulus: calculated as stiffness multiplied by the ratio of tendon length to CSA<br>CSA: 2D US; assessed at 25, 50 and 75% PT length                                                                                                                                                                                                | PT            |
|                             | Long range                           |       |                                                                                                                                                                                                                                                                                                                                                                          |                                                                                                                                                                                                                                                                                                                                                                                                                                                                                                                                |               |
|                             | Full range                           |       |                                                                                                                                                                                                                                                                                                                                                                          |                                                                                                                                                                                                                                                                                                                                                                                                                                                                                                                                |               |
|                             | Control (rec active)                 |       |                                                                                                                                                                                                                                                                                                                                                                          |                                                                                                                                                                                                                                                                                                                                                                                                                                                                                                                                |               |
| McMahon et al., 2018 [68]   | Trained males                        | 8, 3  | 4 x con:ecc exercises p/session (barbell back squat, Bulgarian split squat, leg press, leg extension, dumbbell lunge, static Sampson chair).<br>3 x 10 → 4 x 8 @ 80% 1RM                                                                                                                                                                                                 | Stiffness: ramped iso knee extension on isokinetic dynamometer, with 2D US to assess elongation at the patella apex, calculated as the average stiffness value from 10-100% MVC<br>Modulus: calculated as stiffness multiplied by the ratio of tendon length to CSA<br>CSA: 2D US; assessed at 25, 50 and 75% PT length                                                                                                                                                                                                        | PT            |
|                             | Trained females                      |       |                                                                                                                                                                                                                                                                                                                                                                          |                                                                                                                                                                                                                                                                                                                                                                                                                                                                                                                                |               |
|                             | Control (males, females; rec active) |       |                                                                                                                                                                                                                                                                                                                                                                          |                                                                                                                                                                                                                                                                                                                                                                                                                                                                                                                                |               |

|                             |                                          |       |                                                                                                                                                                              |                                                                                                                                                                                                                                                                                                                                                                                  |    |
|-----------------------------|------------------------------------------|-------|------------------------------------------------------------------------------------------------------------------------------------------------------------------------------|----------------------------------------------------------------------------------------------------------------------------------------------------------------------------------------------------------------------------------------------------------------------------------------------------------------------------------------------------------------------------------|----|
| Mouraux et al., 2000 [118]  | Eccentric                                | 6, 3  | Unilat ecc DF on isokinetic dynamometer<br>3-6 x 10 @ 30-80% peak torque                                                                                                     | Stiffness: not assessed<br>Modulus: not assessed<br>CSA: T2 MRI; assessed 2 cm proximally to calcaneal insertion                                                                                                                                                                                                                                                                 | AT |
|                             | Control limb                             |       | Untrained contralateral limb                                                                                                                                                 |                                                                                                                                                                                                                                                                                                                                                                                  |    |
| Ogiso et al., 2020 [119]    | Non-muscle stimulation (extracted group) | 3, 3  | 3 x 10 reactive jump + 20 maximum effort reactive jumps                                                                                                                      | Stiffness: iso PF MVC on isokinetic dynamometer, with 2D US to assess elongation at GaM MTJ<br>Modulus: not assessed<br>CSA: not assessed                                                                                                                                                                                                                                        | AT |
|                             | Electrical muscle stimulation            |       | Exercises above + electrical muscle stimulation                                                                                                                              |                                                                                                                                                                                                                                                                                                                                                                                  |    |
|                             | Control (recreative)                     |       | No exercise intervention                                                                                                                                                     |                                                                                                                                                                                                                                                                                                                                                                                  |    |
| Onambélé et al., 2008 [120] | Resistance training                      | 12, 3 | Bilat con:ecc knee extension and ankle rotator<br>Resistance: 1-4 x 8-12 @ 80% 1RM                                                                                           | Stiffness: ramped iso PF MVC on isokinetic dynamometer, with 2D US to assess elongation (location n/s)<br>Modulus: not assessed<br>CSA: not assessed                                                                                                                                                                                                                             | AT |
|                             | Inertial flywheel training               |       | Bilat con:ecc YOYO leg extension flywheel and ankle rotator<br>Flywheel: 1-4 x 8-12 @ 100% power output<br><br>5 min inter-set rest                                          |                                                                                                                                                                                                                                                                                                                                                                                  |    |
| Quinlan et al., 2021 [121]  | Young con                                | 8, 3  | Bilat → unilat con or ecc leg press<br>Con: 4 x 15 @ 60% Con 1RM<br>Ecc: 4 x 15 @ 60% Ecc 1RM<br>3 s contraction<br>120 s inter-set rest                                     | Stiffness: ramped iso knee extension MVC on isokinetic dynamometer, with 2D US to assess elongation of PT between patella and tibial insertions, calculated as the gradient of force-elongation curve between 90-100% maximal force<br>Modulus: calculated as tendon stiffness multiplied by the ratio of tendon length to tend CSA<br>CSA: 3T MRI, every 1cm along length of PT | PT |
|                             | Young ecc                                |       |                                                                                                                                                                              |                                                                                                                                                                                                                                                                                                                                                                                  |    |
|                             | Old con                                  |       |                                                                                                                                                                              |                                                                                                                                                                                                                                                                                                                                                                                  |    |
|                             | Old ecc                                  |       |                                                                                                                                                                              |                                                                                                                                                                                                                                                                                                                                                                                  |    |
| Reeves et al., 2003 [69]    | Training                                 | 14, 3 | Bilat con:ecc leg press + leg extension (+ five other non-PT loading/general strength exercises)<br>2 x ~10 @ ~60-80% 5RM<br>Con = ~2s<br>Ecc = ~3s<br>~180 s inter-set rest | Stiffness: ramped iso knee extension MVC on isokinetic dynamometer, with 2D US to assess elongation of the PT, calculated as the gradient over 10% intervals of tendon force<br>Modulus: calculated as stiffness multiplied the ratio of tendon length to CSA<br>CSA: 2D US; 25, 50 and 75% of patella tendon length                                                             | PT |
|                             | Control *                                |       | No exercise intervention – habitual activity                                                                                                                                 |                                                                                                                                                                                                                                                                                                                                                                                  |    |

|                               |                      |         |                                                                                                                                                                        |                                                                                                                                                                                                                                                             |         |
|-------------------------------|----------------------|---------|------------------------------------------------------------------------------------------------------------------------------------------------------------------------|-------------------------------------------------------------------------------------------------------------------------------------------------------------------------------------------------------------------------------------------------------------|---------|
| Reeves et al., 2003 [122]     | Training             | 14, 3   | Bilat con:ecc leg extension + leg press (+ five non-PT loading/general strength exercises)<br>2 x 10 @ ~60-80% 5RM<br>Con = ~2s<br>Ecc = ~3s.<br>~180 s inter-set rest | Stiffness: iso knee extension MVC on isokinetic dynamometer, with 2D US to assess elongation at patella apex, calculated as gradient of force-elongation curve between 60-100% MVC<br>Modulus: not assessed<br>CSA: not assessed                            | PT      |
|                               | Control *            |         | No exercise intervention – habitual activity                                                                                                                           |                                                                                                                                                                                                                                                             |         |
| Sanz-López et al., 2016 [123] | Eccentric overload   | 6, 2    | Bilat con:ecc YoYo flywheel squats to parallel<br>4 x 7 @ 80% 1RM<br>120 s inter-set rest                                                                              | Stiffness: not assessed<br>Modulus: not assessed<br>CSA: 2D US; 3cm proximal to calcaneal insertion                                                                                                                                                         | AT      |
|                               | Control (rec active) |         | No resistance training intervention                                                                                                                                    |                                                                                                                                                                                                                                                             |         |
| Seynnes et al., 2009 [70]     | Training             | 9, 3    | Unilat con:ecc knee extension (Technogym)<br>4 x 10 @ 80% 1RM<br>120 s inter-set rest                                                                                  | Stiffness: ramped iso knee extension on isokinetic dynamometer, with 2D US to assess elongation at patella apex<br>Modulus: calculated as tendon stiffness multiplied by ratio of tendon length to mean CSA<br>CSA: T1 MRI; assessed at 10% intervals       | PT      |
| Standley et al., 2013 [124]   | Aerobic cycling      | 12, 3-4 | 20-45 min cyc @ 60-80% heart rate reserve @ 70-90 rpm<br>42 sessions total                                                                                             | Stiffness: not assessed<br>Modulus: not assessed<br>CSA: MRI; average of all slices                                                                                                                                                                         | PT      |
| Tillin et al., 2012 [125]     | Trained limb         | 4, 4    | Unilat iso explosive knee extension<br>4 x 10 @ ≥90% MVC<br>5 s inter-rep rest<br>120 s inter-set rest                                                                 | Stiffness: ramped iso knee extension MVC via strain gauge, with 2D US to assess displacement of fascicle intersection at VL apon, calculated as slope of force-elongation curve between 10-50% and 50-90% MVC<br>Modulus: not assessed<br>CSA: not assessed | VL Apon |
|                               | Control limb         |         | No exercise intervention                                                                                                                                               |                                                                                                                                                                                                                                                             |         |

|                            |                                           |       |                                                                                                                                                            |                                                                                                                                                                                                                                                                                                                                                                   |         |
|----------------------------|-------------------------------------------|-------|------------------------------------------------------------------------------------------------------------------------------------------------------------|-------------------------------------------------------------------------------------------------------------------------------------------------------------------------------------------------------------------------------------------------------------------------------------------------------------------------------------------------------------------|---------|
| Vikmoen et al., 2016 [59]  | Cc Endurance + strength (extracted group) | 11, 2 | Strength: Smith machine half squat, unilat leg press, unilat cable hip flexion, calf raises<br>3 x 10RM → 4RM (each exercise)<br>Con = ~1 s<br>Ecc = 2-3 s | Stiffness: ramped iso knee extension MVC via force cell, with 2D US to assess displacement of patellar apex relative to tibial plateau; calculated the slope of force-elongation curves between 90-100% MVC<br>Modulus: calculated as stiffness multiplied by ratio of patella length and mean CSA<br>CSA: 2D US; assessed at proximal, middle and distal regions | PT      |
|                            | Endurance (habitual)                      |       | Endurance training (cyc/R, not prescribed): completed on separate day<br>~ 4 x sessions/wk<br>60-100% heart rate                                           |                                                                                                                                                                                                                                                                                                                                                                   |         |
| Wakahara et al., 2015 [75] | Training                                  | 12, 3 | Unilat con:ecc knee extension @ 20-100° knee flexion<br>5 x 8 @ 80% 1RM<br>Con = 2s<br>Ecc = 2s<br>90 s inter-set rest                                     | Stiffness: not assessed<br>Modulus: not assessed<br>CSA: T1 MRI; mean value from all slices with visible apon                                                                                                                                                                                                                                                     | VL apon |
|                            | Control (sedentary/rec active)            |       | No exercise intervention – habitual activity                                                                                                               |                                                                                                                                                                                                                                                                                                                                                                   |         |
| Walker et al., 2020 [58]   | Traditional training                      | 10, 2 | Bilat con:ecc leg press, unilat knee extension, bilat knee flexion<br>Each wk: Session 1 = 3 x 6RM, session 2 = 3 x 10RM                                   | Stiffness: ramped iso knee extension on custom dynamometer, with 2D US to assess elongation between patellar apex and tibial insertion, calculated as the slope of force-elongation curve from 50-100% MVC<br>Modulus: not assessed<br>CSA: not assessed                                                                                                          | PT      |
|                            | Accentuated eccentric training            |       | Accentuated ecc = con load + 40%<br><br>Concentric = 2s, Eccentric = 2s                                                                                    |                                                                                                                                                                                                                                                                                                                                                                   |         |
|                            | Control (active)                          |       | No exercise intervention – own resistance training                                                                                                         |                                                                                                                                                                                                                                                                                                                                                                   |         |
| Waugh et al., 2014 [74]    | Training                                  | 10, 2 | Circuit of team-based activity + 1 x station with 45° con:ecc incline calf raise.<br>2 x 8-15 RM → 3 x 8-15RM                                              | Stiffness: iso PF on isokinetic dynamometer, with 2D US to assess displacement of GaM MTJ, calculated as the slope of linear force-elongation curve between 10-90% MVC<br>Modulus: calculated as slope of stress-strain relationship between 10-90% peak stress<br>CSA: 2D US; assessed ~25 mm from proximal calcaneus                                            | AT      |
|                            | Control *                                 |       | No exercise intervention                                                                                                                                   |                                                                                                                                                                                                                                                                                                                                                                   |         |
| Waugh et al., 2018 [54]    | Long rest                                 | 12, 3 | Unilat iso PF<br>5 x 10 x 3 s @ 90% MVC                                                                                                                    | Stiffness: ramped iso PF on isokinetic dynamometer, with 2D US to assess displacement of GaM MTJ, calculated as the slope of the linear force-alongation curve between 25-90% MVC<br>Modulus: calculated as the slope of the stress-strain curve between 25-90% peak stress<br>CSA: 3D UTC transverse images at 1, 2, 3 and 4 cm proximal to tendon insertion     | AT      |
|                            | Short rest                                |       | Long: 10 s inter-rep rest<br>Short: 3 s inter-rep rest<br>90 s inter-set rest                                                                              |                                                                                                                                                                                                                                                                                                                                                                   |         |



|                              |                         |       |                                                                                                                                                                                                                                                                                                                                                                                                                                                                         |                                                                                                                                                                                                                                                                                                                                                               |    |
|------------------------------|-------------------------|-------|-------------------------------------------------------------------------------------------------------------------------------------------------------------------------------------------------------------------------------------------------------------------------------------------------------------------------------------------------------------------------------------------------------------------------------------------------------------------------|---------------------------------------------------------------------------------------------------------------------------------------------------------------------------------------------------------------------------------------------------------------------------------------------------------------------------------------------------------------|----|
| Waugh et al., 2021 [55]      | Long rest<br>Short rest | 12, 3 | Unilat iso PF<br>5 x 10 x 3 s @ 90% MVC<br>Long: 10 s inter-rep rest<br>Short: 3 s inter-rep rest<br>90 s inter-set rest                                                                                                                                                                                                                                                                                                                                                | Stiffness: ramped iso PF on isokinetic dynamometer, with 2D US to assess displacement of GaM MTJ, calculated as the slope of the linear force-alongation curve between 25-90% MVC<br>Modulus: calculated as the slope of the stress-strain curve between 25-90% peak stress<br>CSA: 3D UTC transverse images at 1, 2, 3 and 4 cm proximal to tendon insertion | AT |
| Werkhausen et al., 2018 [56] | Isometric               | 10, 3 | Unilat iso PF in standing<br>4 x 10 explosive (~1 s) @ 80% MVC<br>5 s inter-rep rest                                                                                                                                                                                                                                                                                                                                                                                    | Stiffness: ramped iso PF on isokinetic dynamometer, with 2D US to assess displacement at GaM MTJ, calculated as the slope of the force-elongation curve between 50-80% MVC<br>Modulus: not assessed<br>CSA: not assessed                                                                                                                                      | AT |
|                              | Control (rec active)    |       | No exercise intervention – habitual exercise                                                                                                                                                                                                                                                                                                                                                                                                                            |                                                                                                                                                                                                                                                                                                                                                               |    |
| Werkhausen et al., 2019 [57] | Training                | 10, 3 | Unilat iso PF in standing<br>4 x 10 explosive (~1 s) @ 80% MVC<br>5 s inter-rep rest                                                                                                                                                                                                                                                                                                                                                                                    | Stiffness: ramped iso PF on isokinetic dynamometer, with 2D US to assess displacement at GaM MTJ, calculated as the slope of the force-elongation curve between 50-80% MVC<br>Modulus: not assessed<br>CSA: not assessed                                                                                                                                      | AT |
|                              | Control (rec active)    |       | Control (rec active)                                                                                                                                                                                                                                                                                                                                                                                                                                                    |                                                                                                                                                                                                                                                                                                                                                               |    |
| Wu et al., 2010 [126]        | Training/Jump           | 8, 2  | Wk 1-2 (low intensity): SJ (10x2); split SJ (10x2); cycled split SJ (10x2)<br>Wk 3-4 (low/med): Split SJ (10x2); pike jump (10x2); double leg tuck jump (10x2)<br>Wk 5-6 (med): Pike jump (10x3); double leg tuck jump (10x3); double leg zigzag hop (10x3); double leg hop (10x3)<br>Wk 7-8 (med/high): Double leg zigzag hop (10x3); double leg hop (10x3); depth jump (10x3); box jump (10x3)<br>30s inter-set rest<br>120s inter-exercise rest<br>Box height = 45cm | Stiffness: ramped iso PF MVC via load cell, with 2D US to assess displacement of GaM MTJ, calculated as slope of ascending phase of muscle contraction between 60-100% MVC (on stress-displacement loop)<br>Modulus: not assessed<br>CSA: not assessed                                                                                                        | AT |
|                              | Control *               |       | General stretch activity for upper limb and back, 2 x p/wk                                                                                                                                                                                                                                                                                                                                                                                                              |                                                                                                                                                                                                                                                                                                                                                               |    |

Notes/abbreviations: AT = Achilles tendon; Bilat = bilateral; Cc = concurrent training; Con = concentric; Con:Ecc = concentric:eccentric; Cyc = cycling; DF = dorsiflexion; Ecc = eccentric; CMJ = countermovement jump; DJ = drop jump; F = female; GaM Apon = Gastrocnemius medialis aponeurosis; GRF = ground reaction force; Iso = isometric; M = Male; min = minute; MRI = magnetic resonance imaging; MTJ = myo/musculotendinous junction; MVC = maximal voluntary contraction; MVT = maximal voluntary torque; n/s = not specified; PF = plantarflexion; PT = patellar tendon; QT = Quadriceps tendon; R = running; rec active = recreationally active; rpm = revolutions per minute; SJ = squat jump; SSC = stretch shortening cycle; Unilat = unilateral; UTC = ultrasound tissue characterisation; VL Apon = Vastus lateralis aponeurosis; Wk = week(s); 2D US = two-dimensional ultrasound; nRM = repetition maximum of n; n x p/wk = number of sessions per week; \* = healthy control participants, no activity status (i.e., not active, recreationally active, trained athlete) not specified; → = progressing to

**S6.** Quality analysis using the PEDro scale, showing individual criteria scores, total score and adjusted relative score (i.e., using number of criteria applicable to study design as the denominator).

| Author                      | Criteria |   |   |   |   |   |   |   |   |    |    | Total | Relative score % |
|-----------------------------|----------|---|---|---|---|---|---|---|---|----|----|-------|------------------|
|                             | 1        | 2 | 3 | 4 | 5 | 6 | 7 | 8 | 9 | 10 | 11 |       |                  |
| Albracht et al., 2013 [5]   | 1        | 0 | 0 | 0 | - | - | 0 | 1 | 1 | 0  | 1  | 3     | 38               |
| Arampatzis et al. 2007 [19] | 0        | 1 | 0 | 1 | - | - | 0 | 1 | 1 | 1  | 1  | 6     | 75               |
| Arampatzis et al. 2010 [20] | 0        | 1 | 0 | 1 | - | - | 0 | 1 | 1 | 1  | 1  | 6     | 75               |
| Baptista et al. 2016 [95]   | 0        | 1 | 0 | 1 | - | - | 1 | 1 | 0 | 1  | 1  | 6     | 75               |
| Bohm et al. 2014 [21]       | 0        | 1 | 0 | 1 | - | - | 0 | 1 | 1 | 1  | 1  | 6     | 75               |
| Bohm et al., 2021 [17]      | 1        | 1 | 0 | 1 | - | - | 0 | 0 | 1 | 1  | 1  | 5     | 62.5             |
| Carroll et al. 2011 [62]    | 1        | 1 | 0 | 0 | - | - | 1 | 1 | 0 | 1  | 1  | 5     | 63               |
| Centner et al., 2019 [71]   | 1        | 1 | 1 | 1 | - | - | 1 | 0 | 1 | 1  | 1  | 7     | 88               |
| Dalgaard et al. 2019 [104]  | 1        | 0 | 0 | 1 | - | - | 1 | 1 | 1 | 0  | 1  | 5     | 63               |
| Duclay et al., 2009 [105]   | 1        | 0 | 0 | 1 | - | - | 0 | 1 | 1 | 0  | 1  | 4     | 50               |
| Eriksen et al. 2018 [63]    | 1        | 1 | 0 | 0 | - | - | 1 | 0 | 1 | 1  | 1  | 5     | 63               |
| Eriksen et al. 2019 [64]    | 1        | 1 | 1 | 1 | - | - | 0 | 1 | 1 | 1  | 1  | 7     | 88               |
| Farup et al., 2014 [106]    | 1        | 0 | 0 | 1 | - | - | 1 | 0 | 1 | 1  | 1  | 5     | 63               |
| Fletcher et al., 2010 [60]  | 1        | 1 | 0 | 1 | - | - | 0 | 1 | 1 | 1  | 1  | 6     | 75               |
| Fouré et al. 2009 [107]     | 0        | 1 | 0 | 1 | - | - | 0 | 0 | 0 | 0  | 1  | 3     | 38               |
| Fouré et al. 2010 [49]      | 0        | 1 | 0 | 1 | - | - | 0 | 1 | 1 | 0  | 1  | 5     | 63               |
| Fouré et al. 2011 [50]      | 0        | 1 | 0 | 1 | - | - | 0 | 0 | 0 | 0  | 1  | 3     | 38               |
| Fouré et al. 2012 [51]      | 0        | 0 | 0 | 1 | - | - | 0 | 1 | 1 | 0  | 1  | 4     | 50               |
| Fouré et al. 2013 [108]     | 0        | 1 | 0 | 1 | - | - | 0 | 0 | 0 | 0  | 1  | 3     | 38               |

|                             |   |   |   |   |   |   |   |   |   |   |   |   |     |
|-----------------------------|---|---|---|---|---|---|---|---|---|---|---|---|-----|
| Geremia et al., 2018 [72] * | 1 | - | - | - | - | - | 0 | 0 | 1 | - | 1 | 2 | 50  |
| Hirayama et al. 2017 [109]  | 0 | 1 | 0 | 1 | - | - | 0 | 0 | 0 | 0 | 1 | 3 | 38  |
| Houghton et al., 2013 [73]  | 1 | 0 | 0 | 0 | - | - | 0 | 0 | 0 | 1 | 1 | 2 | 25  |
| Kay et al. 2016 [110] *     | 0 | - | - | - | - | - | 0 | 0 | 0 | - | 1 | 1 | 25  |
| Kongsgaard et al. 2007 [65] | 0 | 1 | 0 | 1 | - | - | 1 | 0 | 0 | 1 | 1 | 5 | 63  |
| Kubo et al. 2001 [51]       | 0 | 1 | 0 | 1 | - | - | 0 | 0 | 0 | 1 | 1 | 4 | 50  |
| Kubo et al. 2001 [52] *     | 0 | - | - | - | - | - | 0 | 0 | 0 | - | 1 | 1 | 25  |
| Kubo et al. 2002 [111]      | 0 | 1 | 0 | 1 | - | - | 0 | 0 | 0 | 1 | 1 | 4 | 50  |
| Kubo et al. 2006 [112]      | 0 | 0 | 0 | 1 | - | - | 0 | 1 | 1 | 1 | 1 | 5 | 63  |
| Kubo et al. 2006 [113]      | 0 | 1 | 0 | 1 | - | - | 0 | 0 | 0 | 1 | 1 | 4 | 50  |
| Kubo et al., 2006 [96]      | 0 | 1 | 0 | 1 | - | - | 0 | 0 | 0 | 1 | 1 | 4 | 50  |
| Kubo et al. 2007 [85]       | 0 | 1 | 0 | 0 | - | - | 0 | 0 | 0 | 0 | 1 | 2 | 25  |
| Kubo et al. 2009 [114]      | 0 | 1 | 0 | 1 | - | - | 0 | 0 | 0 | 0 | 1 | 3 | 38  |
| Kubo et al., 2010 [115]     | 0 | 1 | 0 | 1 | - | - | 0 | 0 | 0 | 1 | 1 | 4 | 50  |
| Kubo et al. 2010 [88]       | 0 | 1 | 0 | 0 | - | - | 0 | 1 | 1 | 0 | 1 | 4 | 50  |
| Kubo et al. 2012 [89]       | 0 | 1 | 0 | 0 | - | - | 0 | 0 | 0 | 0 | 1 | 2 | 25  |
| Kubo et al., 2017 [86]      | 0 | 1 | 0 | 1 | - | - | 0 | 0 | 0 | 1 | 1 | 4 | 50  |
| Kubo et al., 2017 [116]     | 0 | 1 | 0 | 0 | - | - | 0 | 0 | 0 | 0 | 1 | 2 | 25  |
| Laurent et al. 2020 [117]   | 0 | 1 | 0 | 1 | - | - | 0 | 1 | 1 | 1 | 1 | 6 | 75  |
| Malliaras et al. 2013 [61]  | 1 | 1 | 1 | 1 | - | - | 1 | 1 | 1 | 1 | 1 | 8 | 100 |
| Massey et al. 2018 [66]     | 0 | 1 | 0 | 1 | - | - | 0 | 1 | 1 | 1 | 1 | 6 | 75  |
| McMahon et al. 2013 [67]    | 1 | 1 | 0 | 0 | - | - | 0 | 0 | 0 | 1 | 1 | 3 | 38  |
| McMahon et al. 2018 [68]    | 1 | 1 | 0 | 1 | - | - | 0 | 1 | 1 | 1 | 1 | 6 | 75  |

|                               |    |    |   |    |   |   |    |    |    |    |     |   |    |
|-------------------------------|----|----|---|----|---|---|----|----|----|----|-----|---|----|
| Mouraux et al., 2000 [118]    | 1  | 0  | 0 | 1  | - | - | 0  | 0  | 0  | 1  | 1   | 3 | 38 |
| Ogiso et al., 2020 [119]      | 1  | 1  | 0 | 1  | - | - | 0  | 0  | 0  | 0  | 1   | 3 | 38 |
| Onambélé et al., 2008 [120]   | 0  | 1  | 0 | 1  | - | - | 0  | 1  | 1  | 1  | 1   | 6 | 75 |
| Quinlan et al., 2021 [121]    | 1  | 1  | 0 | 1  | - | - | 0  | 1  | 1  | 1  | 1   | 6 | 75 |
| Reeves et al. 2003 [69]       | 0  | 1  | 0 | 1  | - | - | 0  | 0  | 0  | 0  | 1   | 3 | 38 |
| Reeves et al. 2003 [122]      | 0  | 1  | 0 | 1  | - | - | 0  | 1  | 1  | 0  | 1   | 5 | 63 |
| Sanz-López et al. 2016 [123]  | 1  | 0  | 0 | 1  | - | - | 1  | 1  | 1  | 0  | 1   | 4 | 50 |
| Seynnes et al. 2009 [70] *    | 1  | -  | - | -  | - | - | 0  | 0  | 0  | -  | 1   | 1 | 25 |
| Standley et al., 2013 [124] * | 0  | -  | - | -  | - | - | 1  | 0  | 1  | -  | 1   | 3 | 75 |
| Tillin et al., 2012 [125]     | 1  | 1  | 0 | 1  | - | - | 0  | 1  | 0  | 1  | 1   | 5 | 63 |
| Vikmoen et al., 2016 [59]     | 1  | 1  | 0 | 1  | - | - | 0  | 0  | 0  | 1  | 1   | 4 | 50 |
| Wakahara et al., 2015 [75]    | 0  | 1  | 0 | 1  | - | - | 0  | 0  | 0  | 0  | 1   | 3 | 38 |
| Walker et al., 2020 [58]      | 1  | 0  | 0 | 0  | - | - | 0  | 0  | 0  | 1  | 1   | 2 | 25 |
| Waugh et al. 2014 [74]        | 0  | 1  | 0 | 1  | - | - | 0  | 1  | 1  | 1  | 1   | 6 | 75 |
| Waugh et al. 2018 [54]        | 0  | 1  | 1 | 1  | - | - | 1  | 0  | 1  | 1  | 1   | 7 | 88 |
| Waugh et al., 2021 [55]       | 1  | 1  | 0 | 1  | - | - | 0  | 0  | 0  | 1  | 1   | 4 | 50 |
| Werkhausen et al. 2018 [56]   | 0  | 0  | 0 | 1  | - | - | 0  | 0  | 0  | 1  | 1   | 3 | 38 |
| Werkhausen et al., 2019 [57]  | 1  | 0  | 0 | 1  | - | - | 0  | 0  | 0  | 1  | 1   | 3 | 38 |
| Wu et al. 2010 [126]          | 1  | 1  | 0 | 1  | - | - | 0  | 1  | 1  | 0  | 1   | 5 | 63 |
|                               | 43 | 79 | 7 | 82 | - | - | 18 | 41 | 48 | 64 | 100 |   |    |

Note: Relative score = total score/maximum possible score for the study design (Multiple group, experimental = 8, Single group = 4). Dash/hyphen denotes criterion is not applicable for study design. PEDro score does not use Criterion 1 for calculating total and subsequently is also not included in the calculation of the relative score. Studies with a single group (\*) cannot achieve criteria 2-4 or 10 which have also been removed from

*calculation of the relative score for those papers and the percentage of papers meeting the criteria. ITT = Intention to treat; Criteria: 1) Eligibility criteria specified; 2) Random allocation to groups; 3) Allocation concealment ; 4) Groups are similar at baseline; 5) Blinding of subjects to allocation/condition; 6) Blinding of therapist delivering condition; 7) Blinding of assessor of key outcome; 8) Key outcome recorded for >85% of participants; 9) All subjects received the condition, or an intention to treat analysis was used; 10) Between-groups statistics documented; 11) Point measures and variability provided for outcomes.*

**S7.** Forest plot for the meta-analysis of stiffness subdivided by training intervention type showing standardised mean differences (SMD) and 95% confidence intervals (CI).

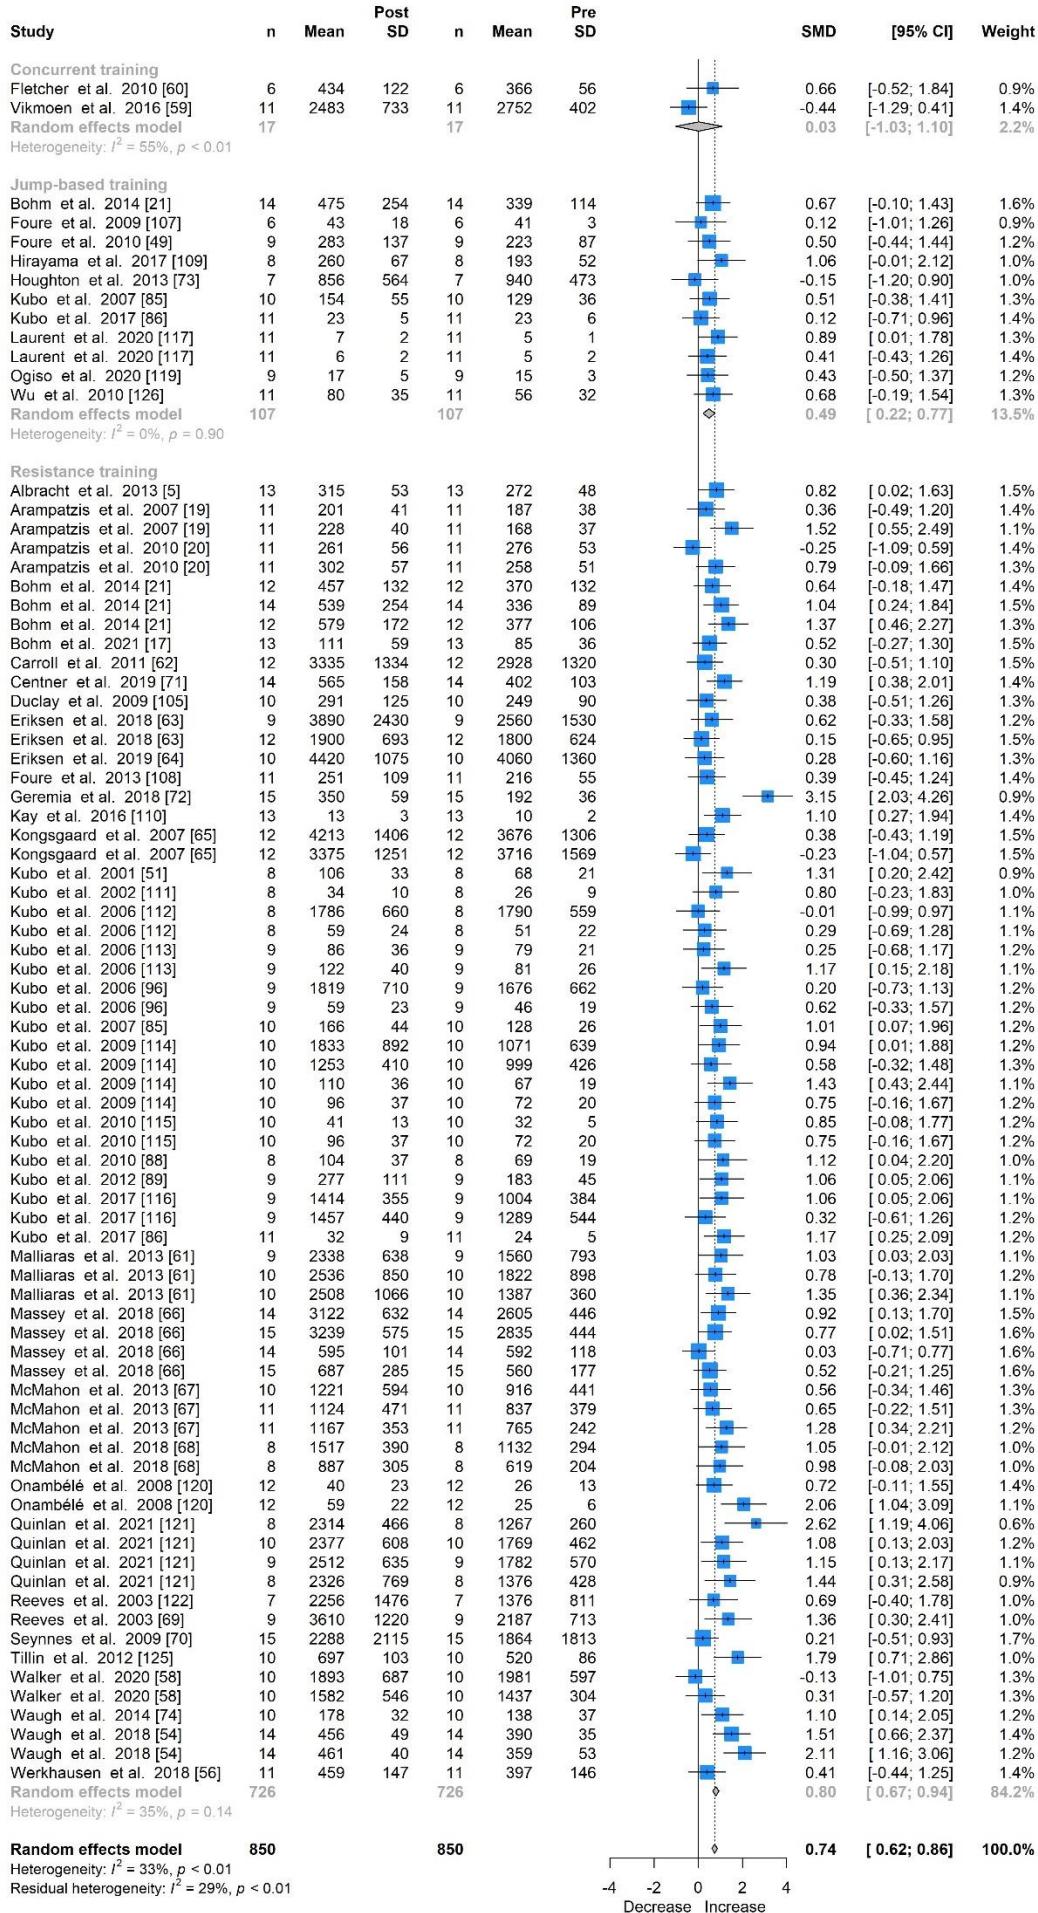

**S8.** Forest plot for the meta-analysis of modulus subdivided by training intervention type showing standardised mean differences (SMD) and 95% confidence intervals (CI).

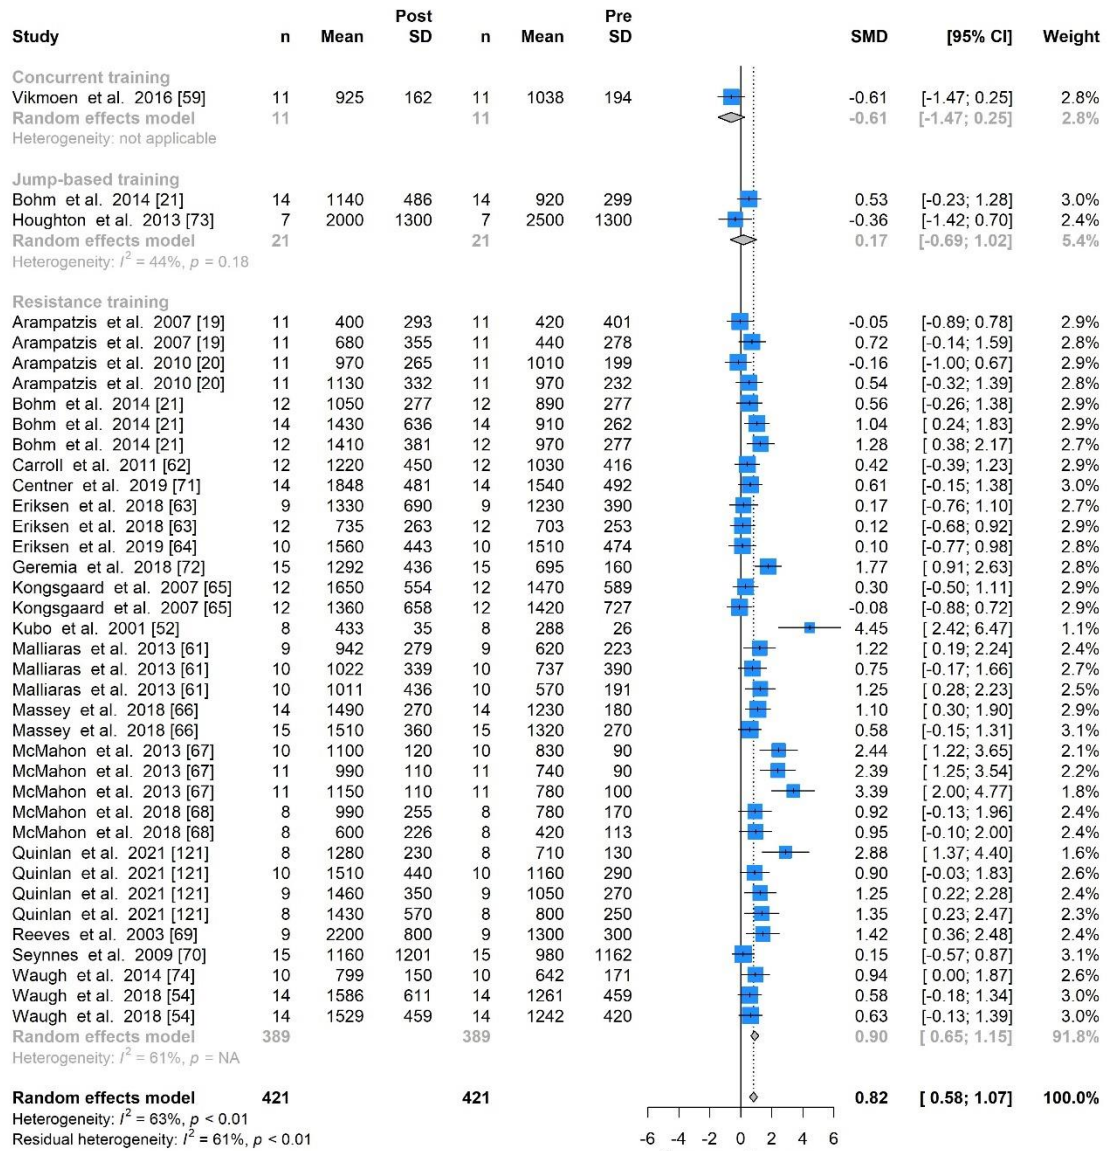



**S9.** Forest plot for the meta-analysis of cross-sectional area subdivided by training type showing standardised mean differences (SMD) and 95% confidence intervals (CI).

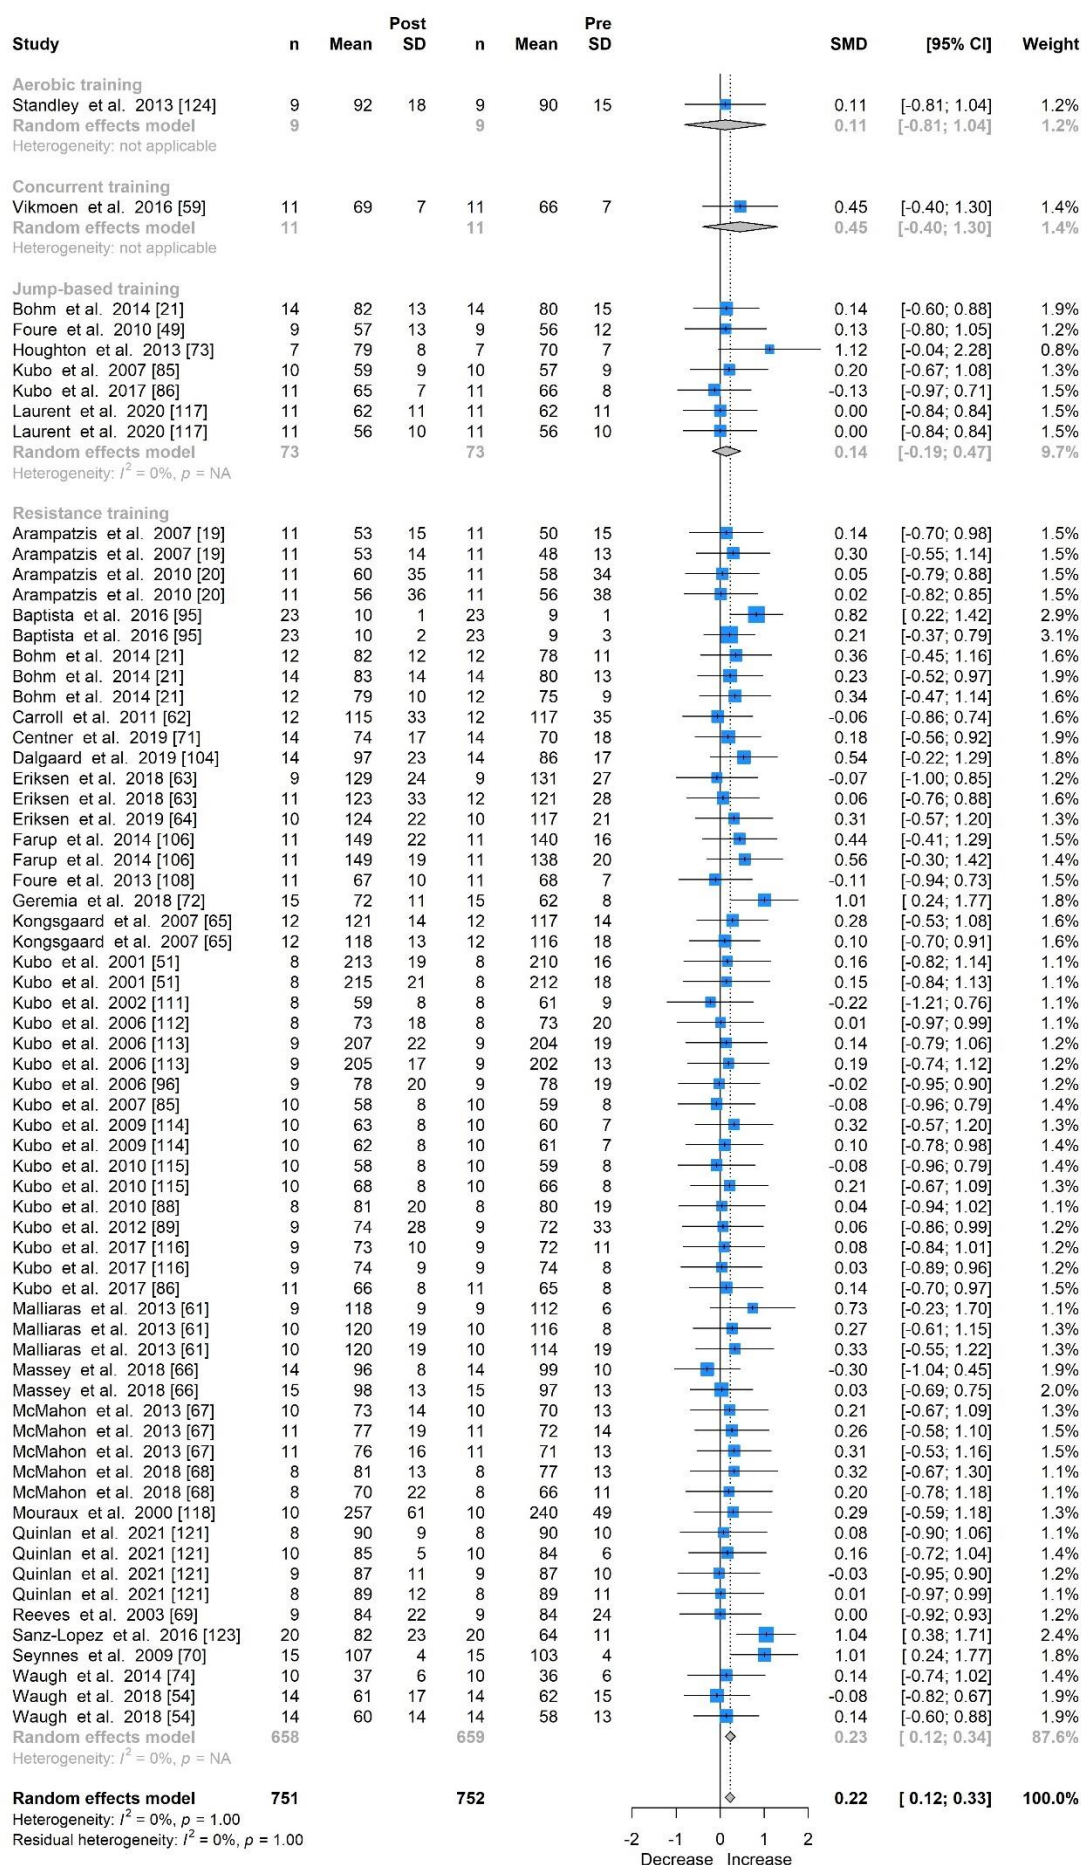



**S10.** Descriptive statistics for sub-group analyses in Figure 6, showing mean, 95% confidence intervals and range of quantitative grouping variables.

| Variable         | Sub-group | N  | Mean    | 95%CI             | Range        |
|------------------|-----------|----|---------|-------------------|--------------|
| Intensity (%)    | Low       | 7  | 57.86   | 55.88 – 59.84     | 55 – 60      |
|                  | High      | 54 | 82.02   | 79.54 – 84.50     | 70 – 120     |
| Strain (%)       | Low       | 2  | 2.99    | 2.96 – 3.01       | 2.97 – 3.00  |
|                  | High      | 6  | 6.12    | 5.33 – 6.91       | 4.72 – 6.90  |
| Volume (au)      | Low       | 23 | 1715.87 | 1332.73 – 2099.01 | 280 - 3060   |
|                  | High      | 33 | 5692.73 | 3936.78 – 7448.68 | 3200 – 32400 |
| Duration (weeks) | <12       | 12 | 7.33    | 6.42 – 8.25       | 4 – 10       |
|                  | ≥12       | 40 | 13.40   | 11.44 – 15.36     | 12 – 52      |

**S11.** Forest plot for the meta-analysis of stiffness subdivided by protocol intensity (high versus low) showing standardised mean differences (SMD) and 95% confidence intervals (CI) of resistance training studies.

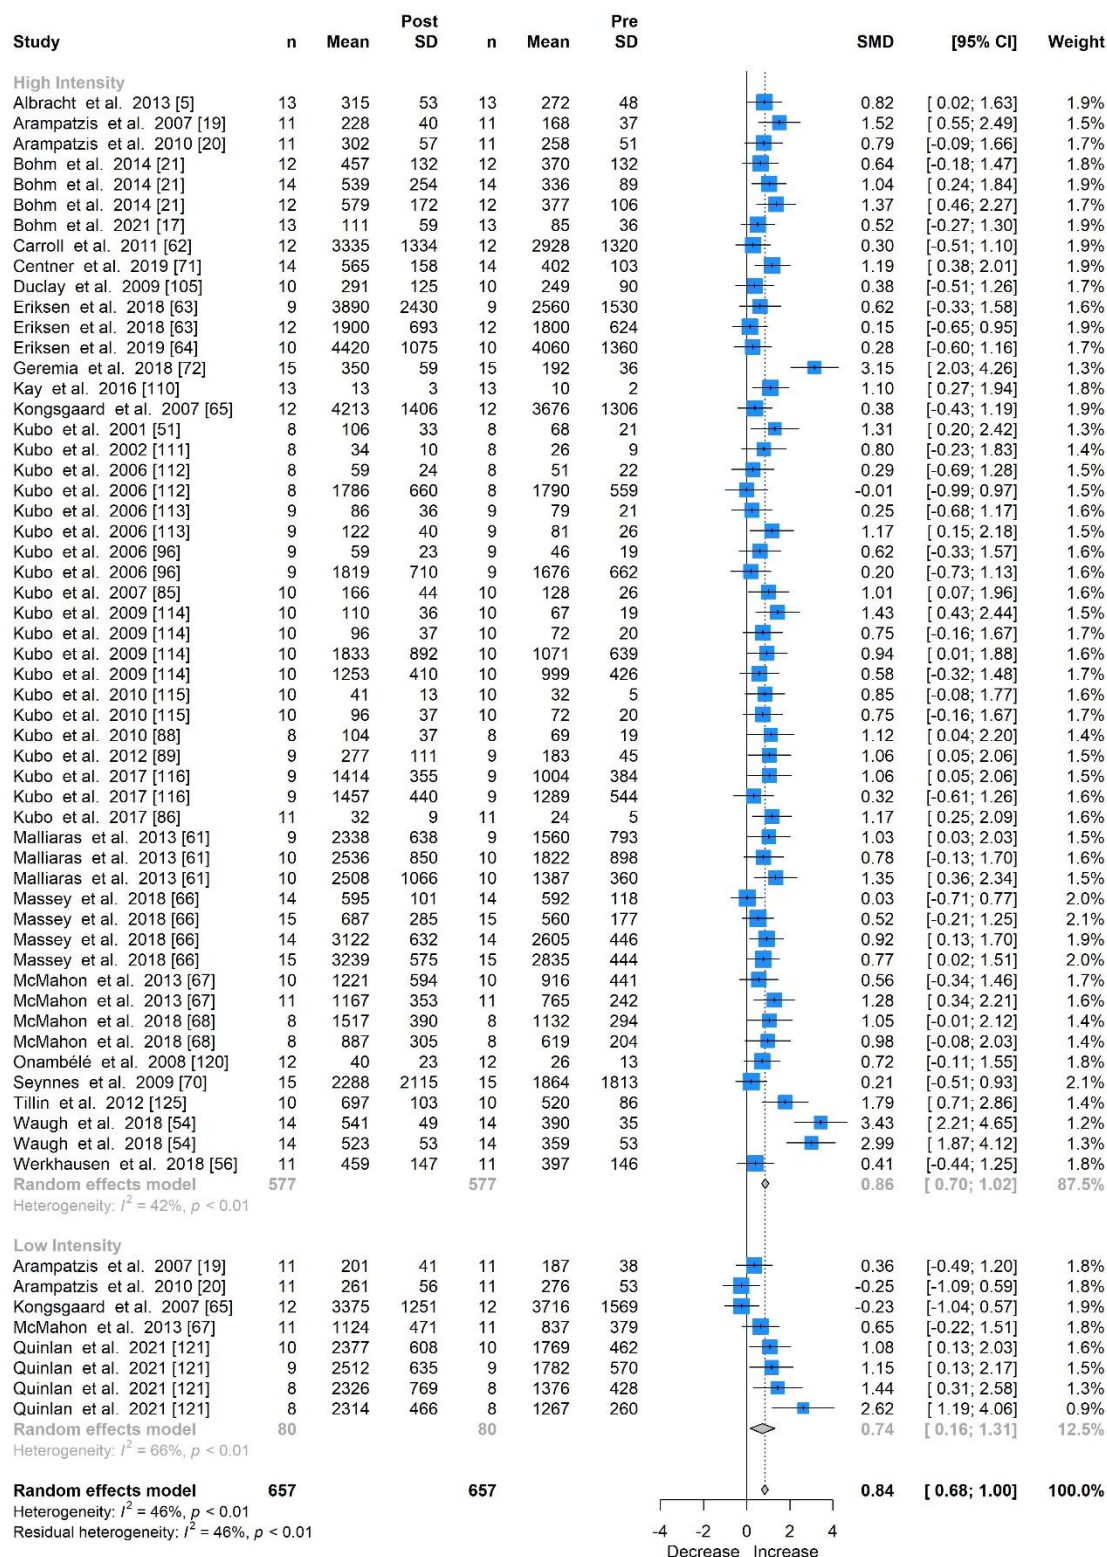

**S12.** Forest plot for the meta-analysis of modulus subdivided by protocol intensity (high versus low) showing standardised mean differences (SMD) and 95% confidence intervals (CI) of resistance training studies.

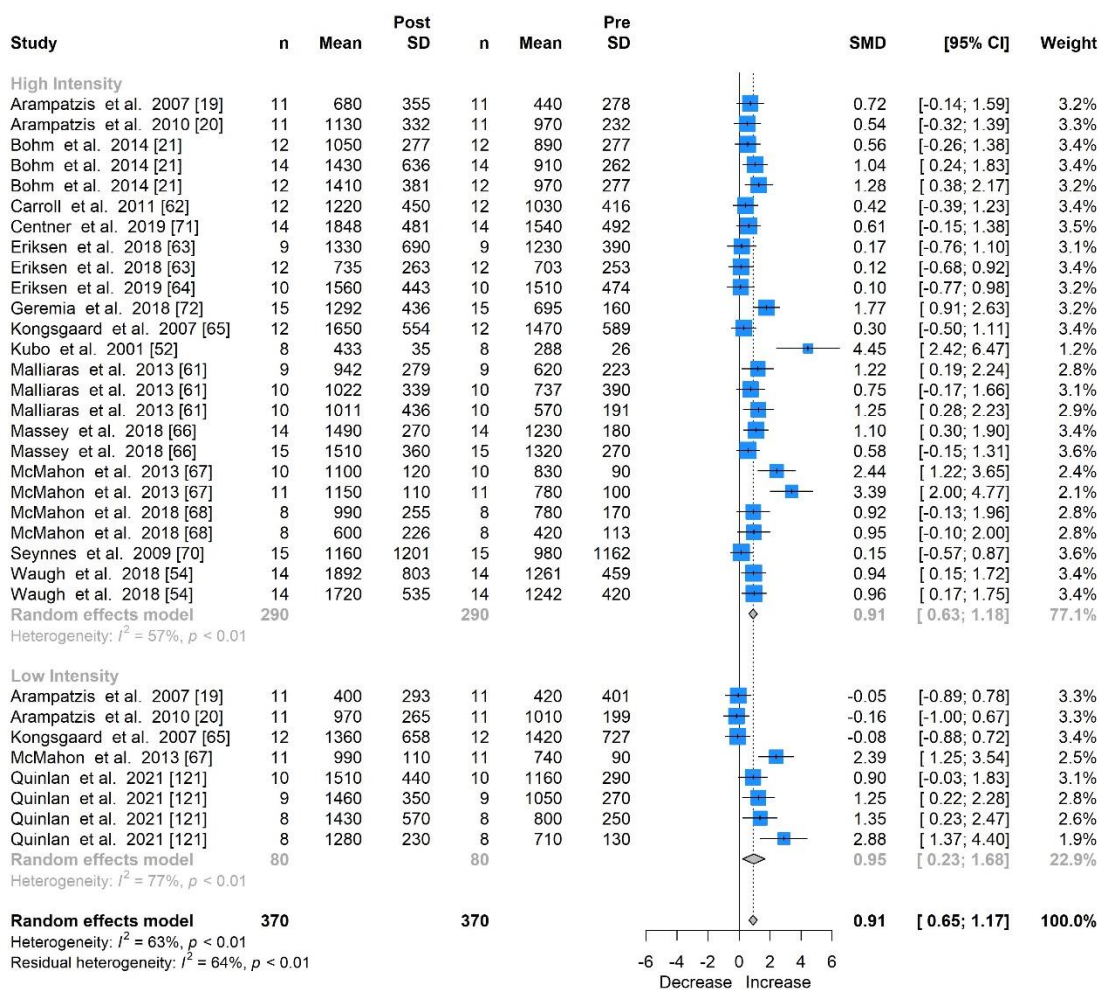

**S13.** Forest plot for the meta-analysis of cross-sectional area subdivided by protocol intensity (high versus low) showing standardised mean differences (SMD) and 95% confidence intervals (CI) of resistance training studies.

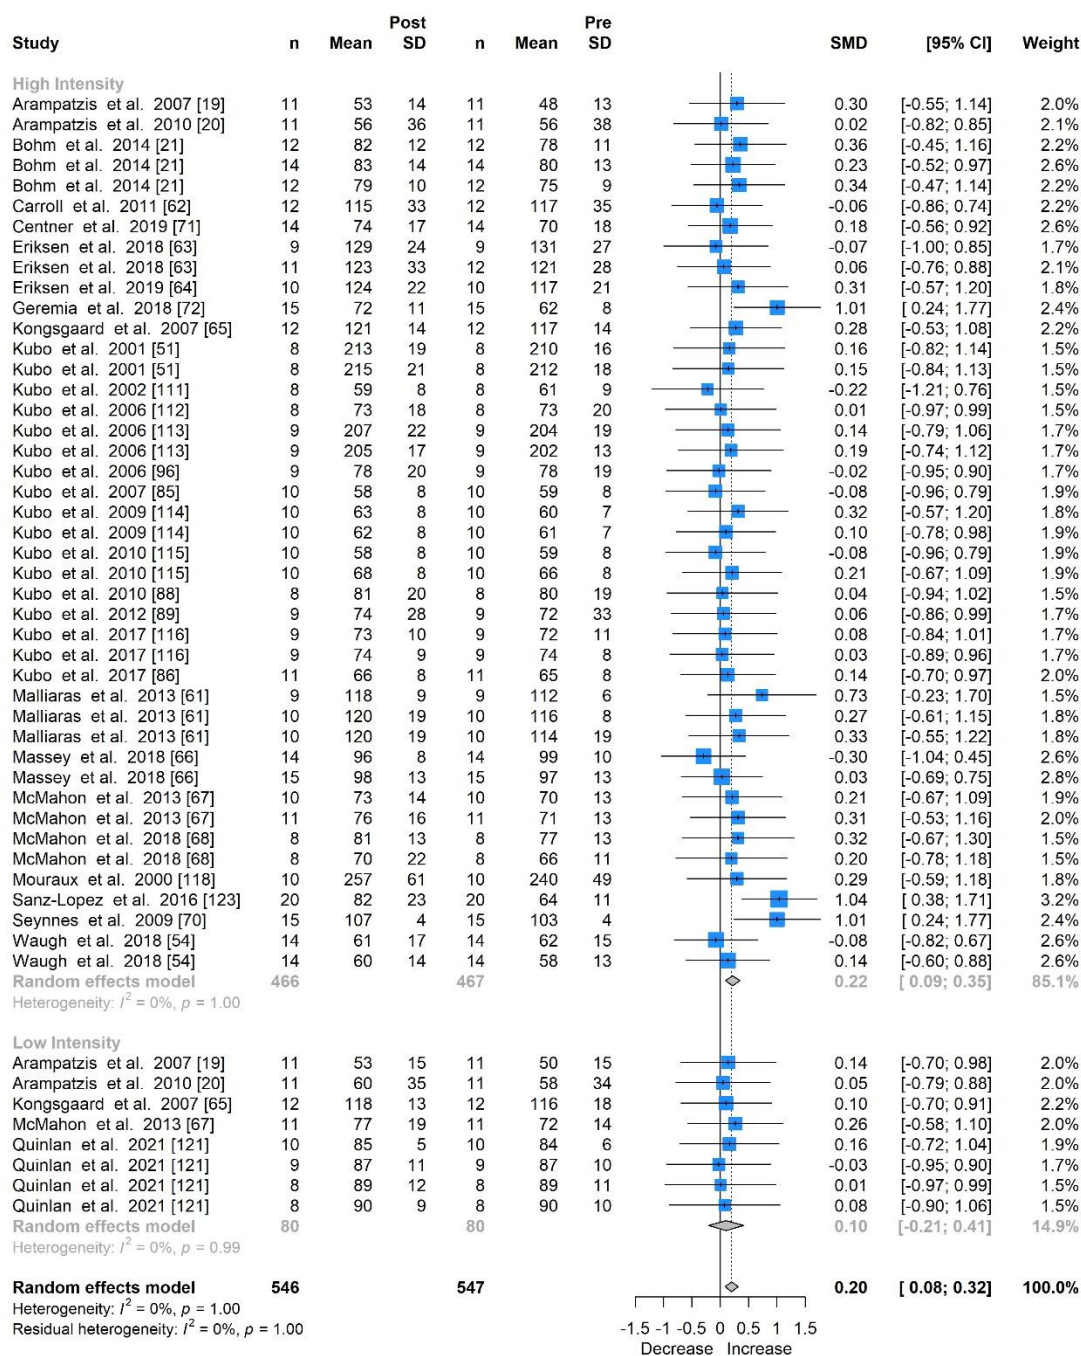

**S14.** Forest plot for the meta-analysis of stiffness subdivided by protocol strain (high versus low) showing standardised mean differences (SMD) and 95% confidence intervals (CI) of resistance training studies.

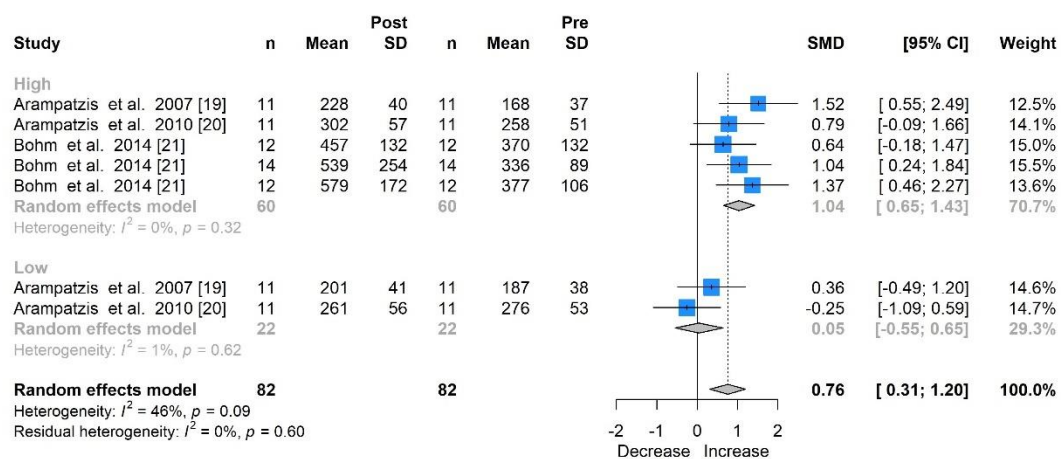



**S15.** Forest plot for the meta-analysis of modulus subdivided by protocol strain (high versus low) showing standardised mean differences (SMD) and 95% confidence intervals (CI) of resistance training studies.

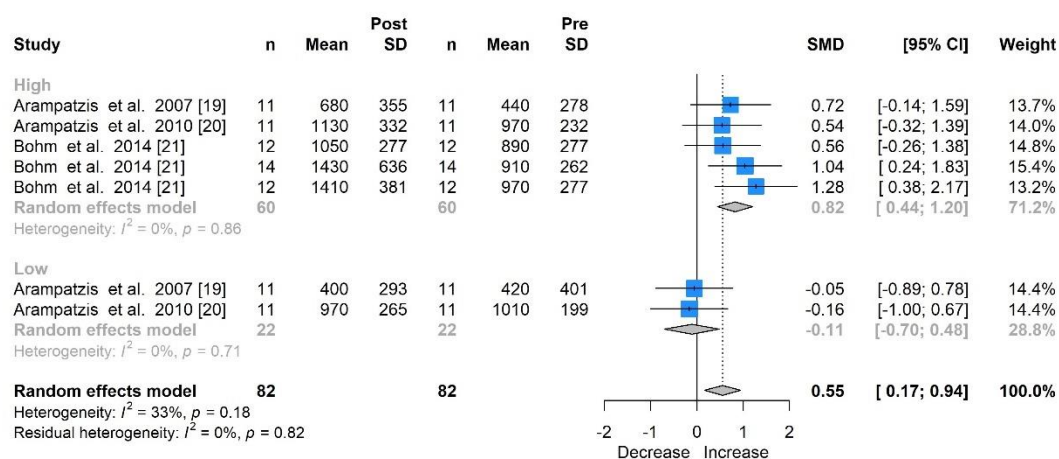

**S16.** Forest plot for the meta-analysis of cross-sectional area subdivided by protocol strain (high versus low) showing standardised mean differences (SMD) and 95% confidence intervals (CI) of resistance training studies.

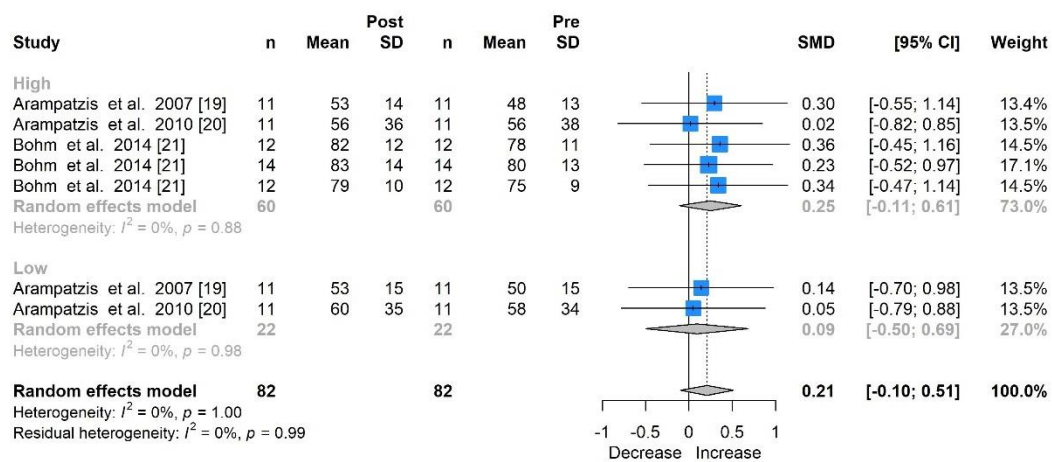

**S17.** Forest plot for the meta-analysis of stiffness subdivided by training volume (high versus low) showing standardised mean differences (SMD) and 95% confidence intervals (CI) of resistance training studies.

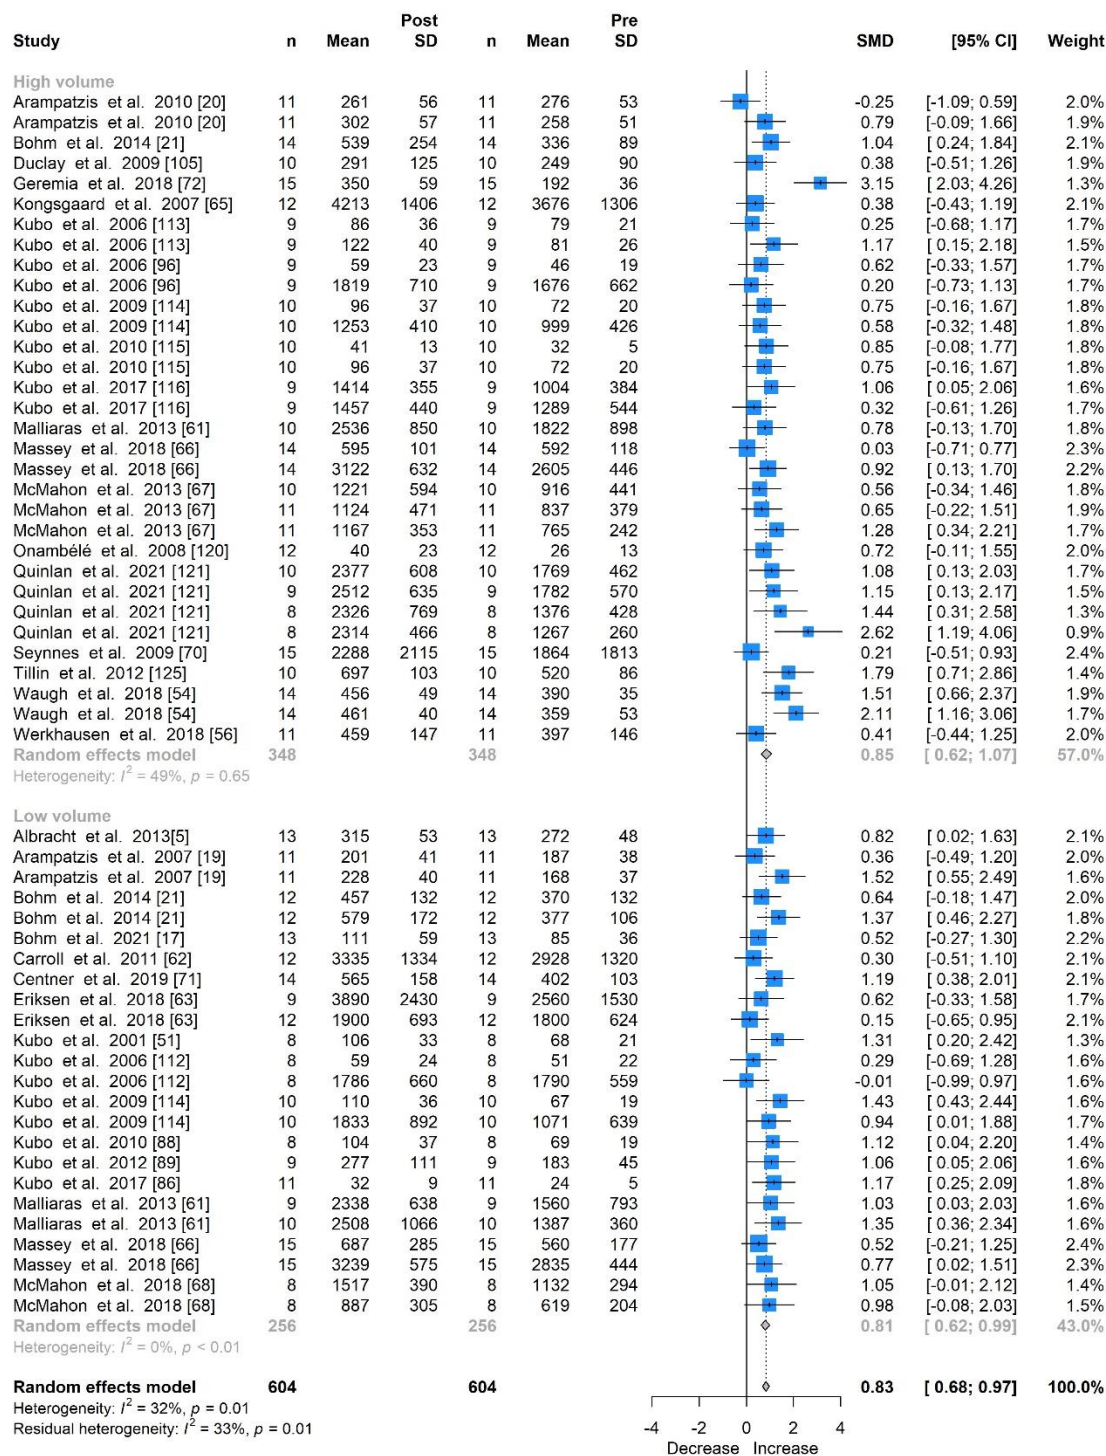



**S18.** Forest plot for the meta-analysis of modulus subdivided by training volume (high versus low) showing standardised mean differences (SMD) and 95% confidence intervals (CI) of resistance training studies.

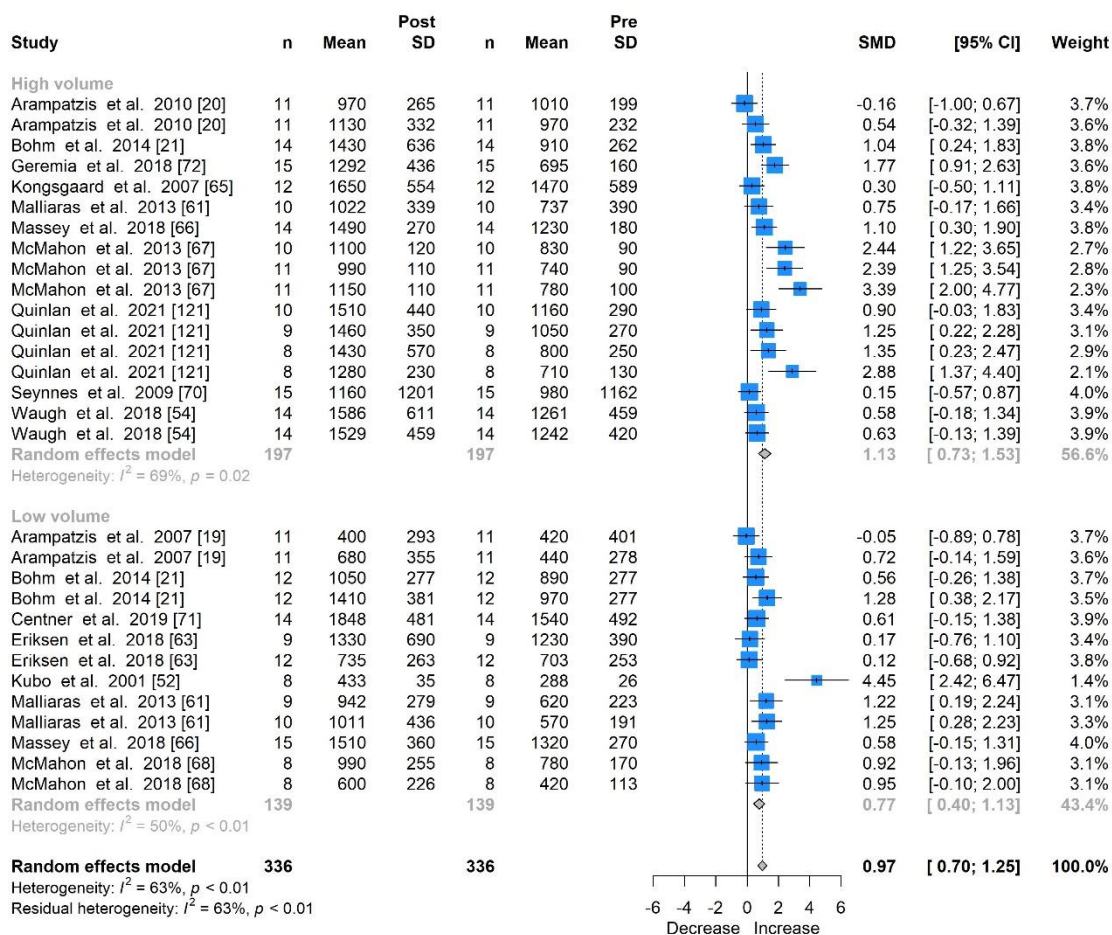

**S19.** Forest plot for the meta-analysis of cross-sectional area subdivided by training volume (high versus low) showing standardised mean differences (SMD) and 95% confidence intervals (CI) of resistance training studies.

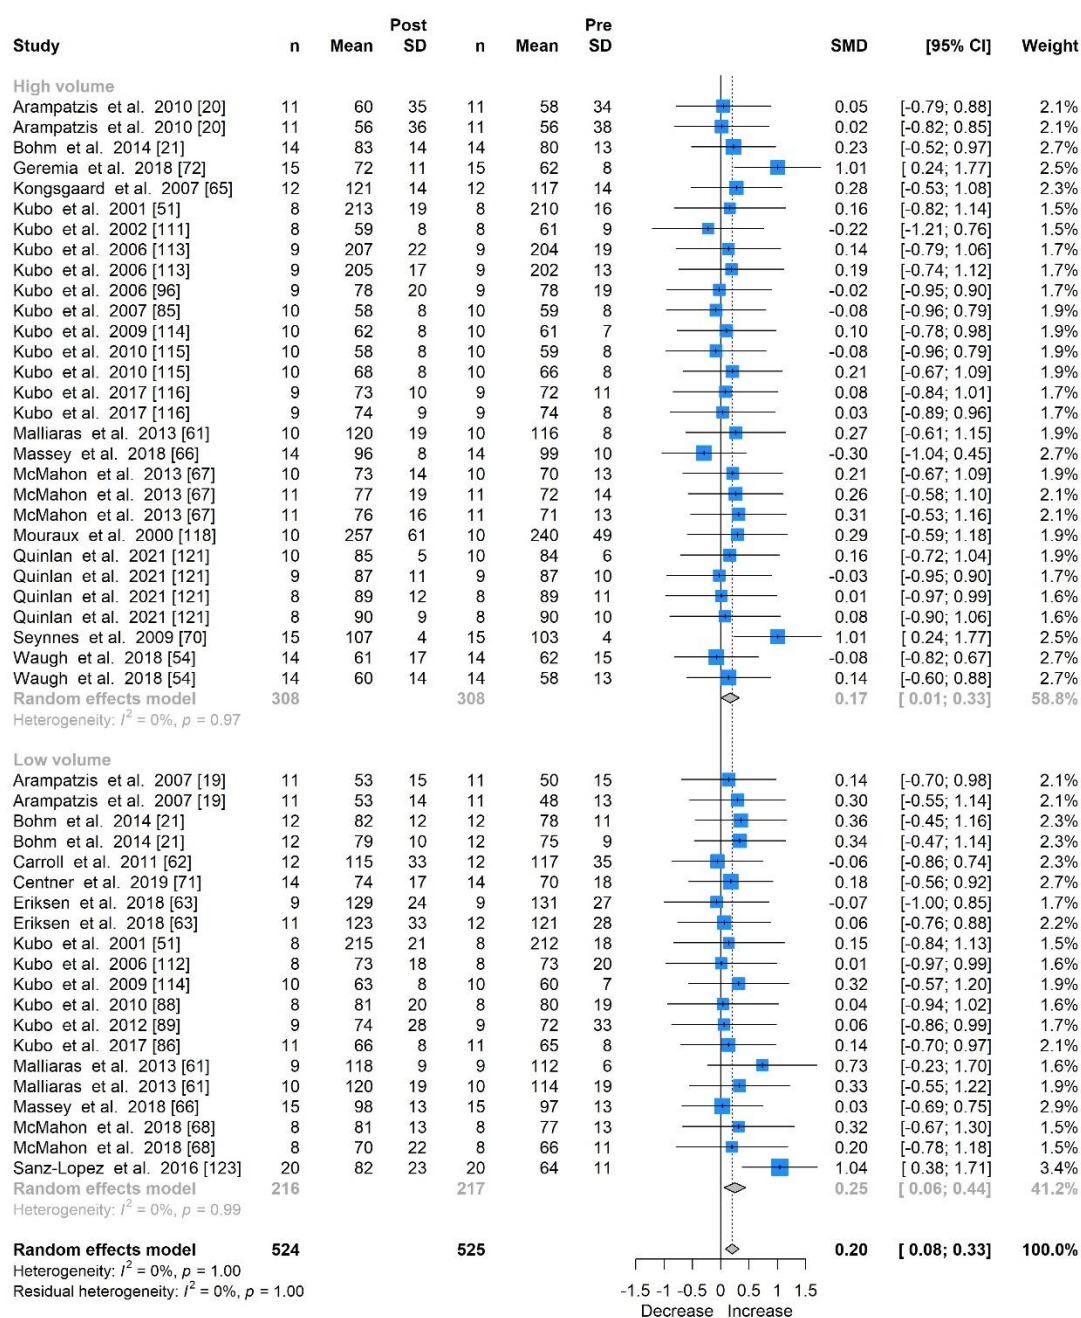

**S20.** Forest plot for the meta-analysis of stiffness subdivided by protocol duration showing standardised mean differences (SMD) and 95% confidence intervals (CI) of high intensity, resistance training studies.

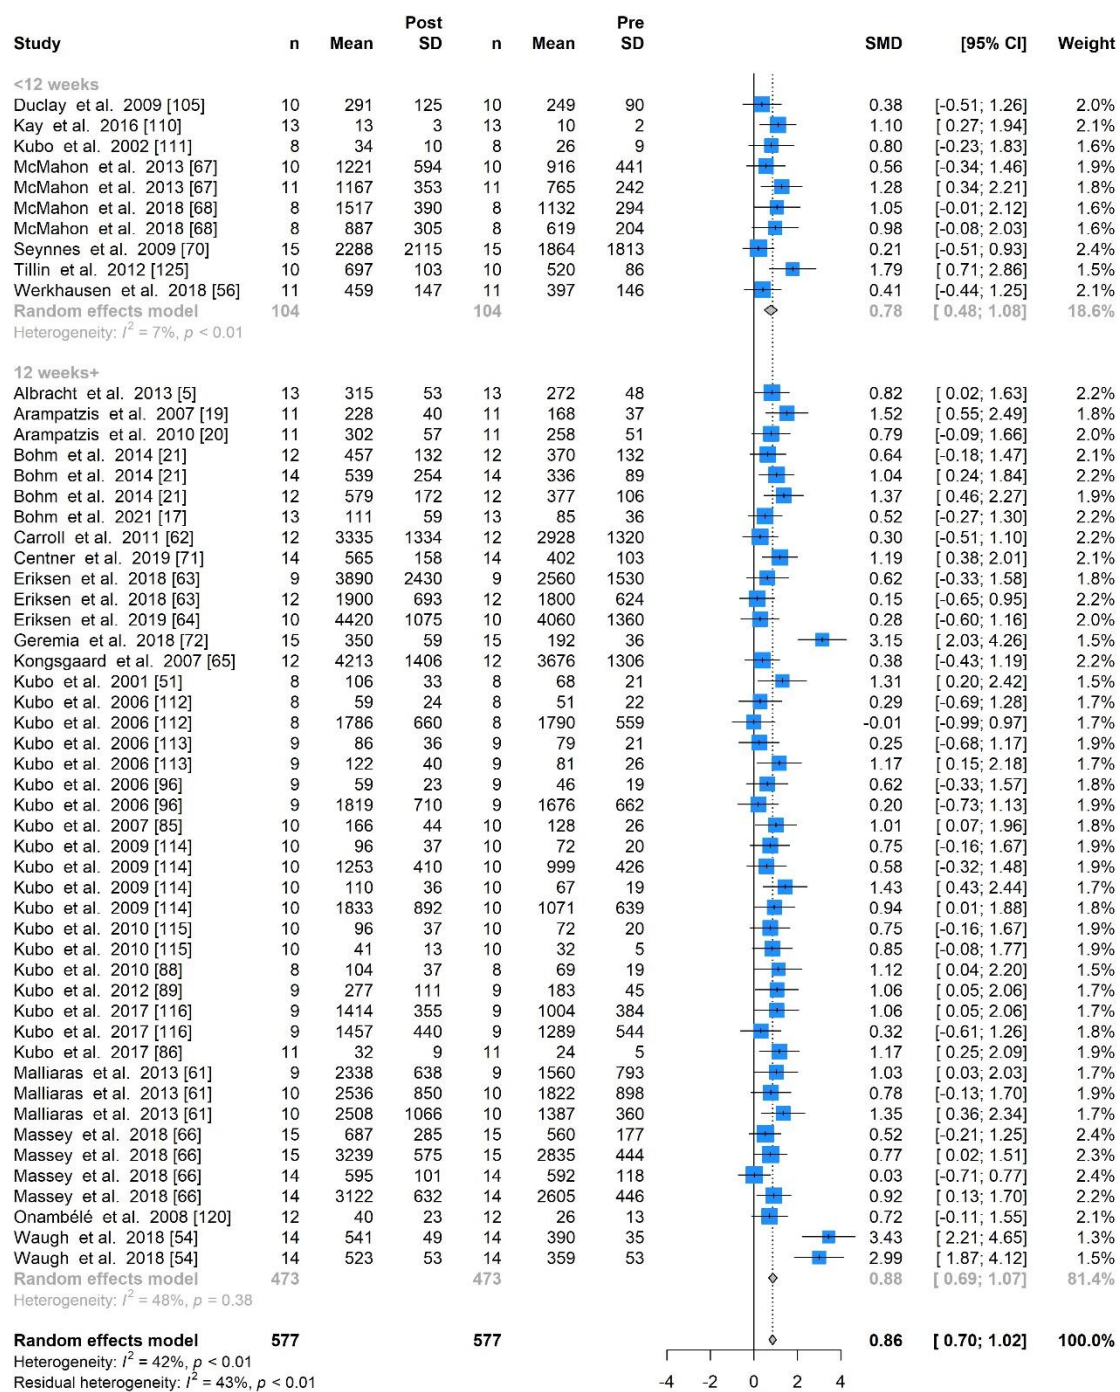



**S21.** Forest plot for the meta-analysis of modulus subdivided by protocol duration showing standardised mean differences (SMD) and 95% confidence intervals (CI) of high intensity, resistance training studies.

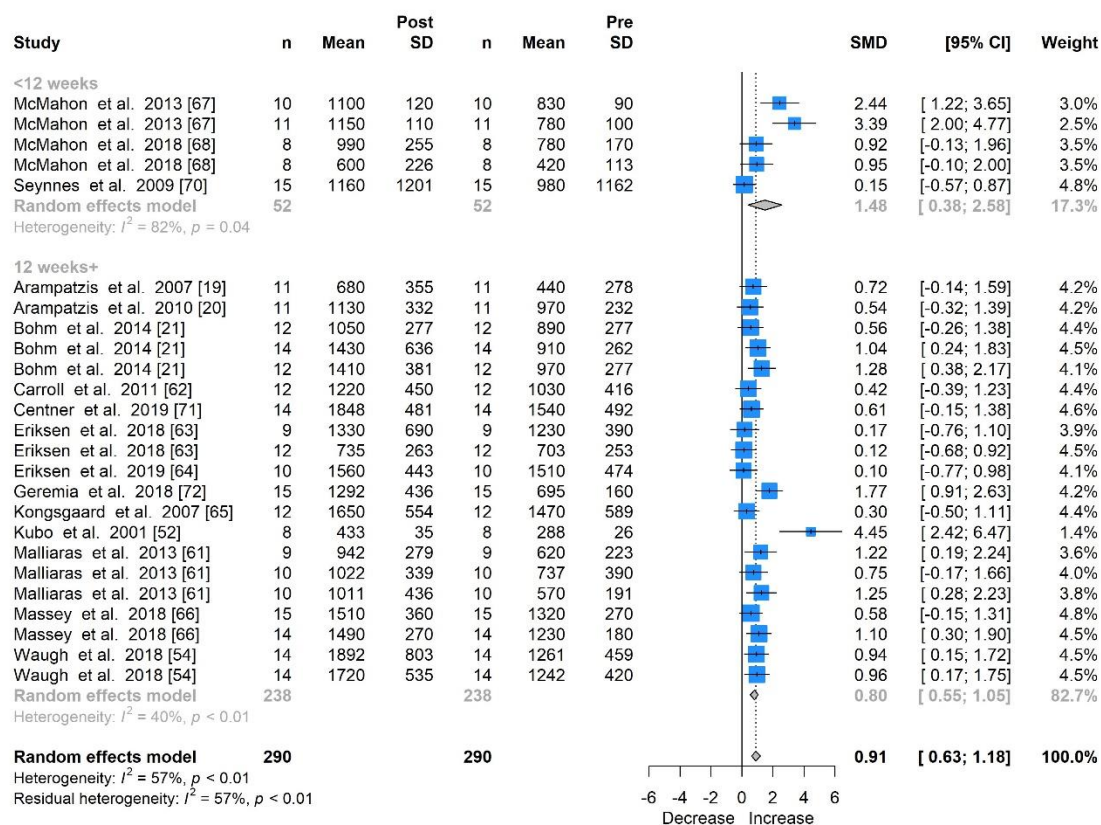

**S22.** Forest plot for the meta-analysis of cross-sectional area subdivided by protocol duration showing standardised mean differences (SMD) and 95% confidence intervals (CI) of high intensity, resistance training studies.

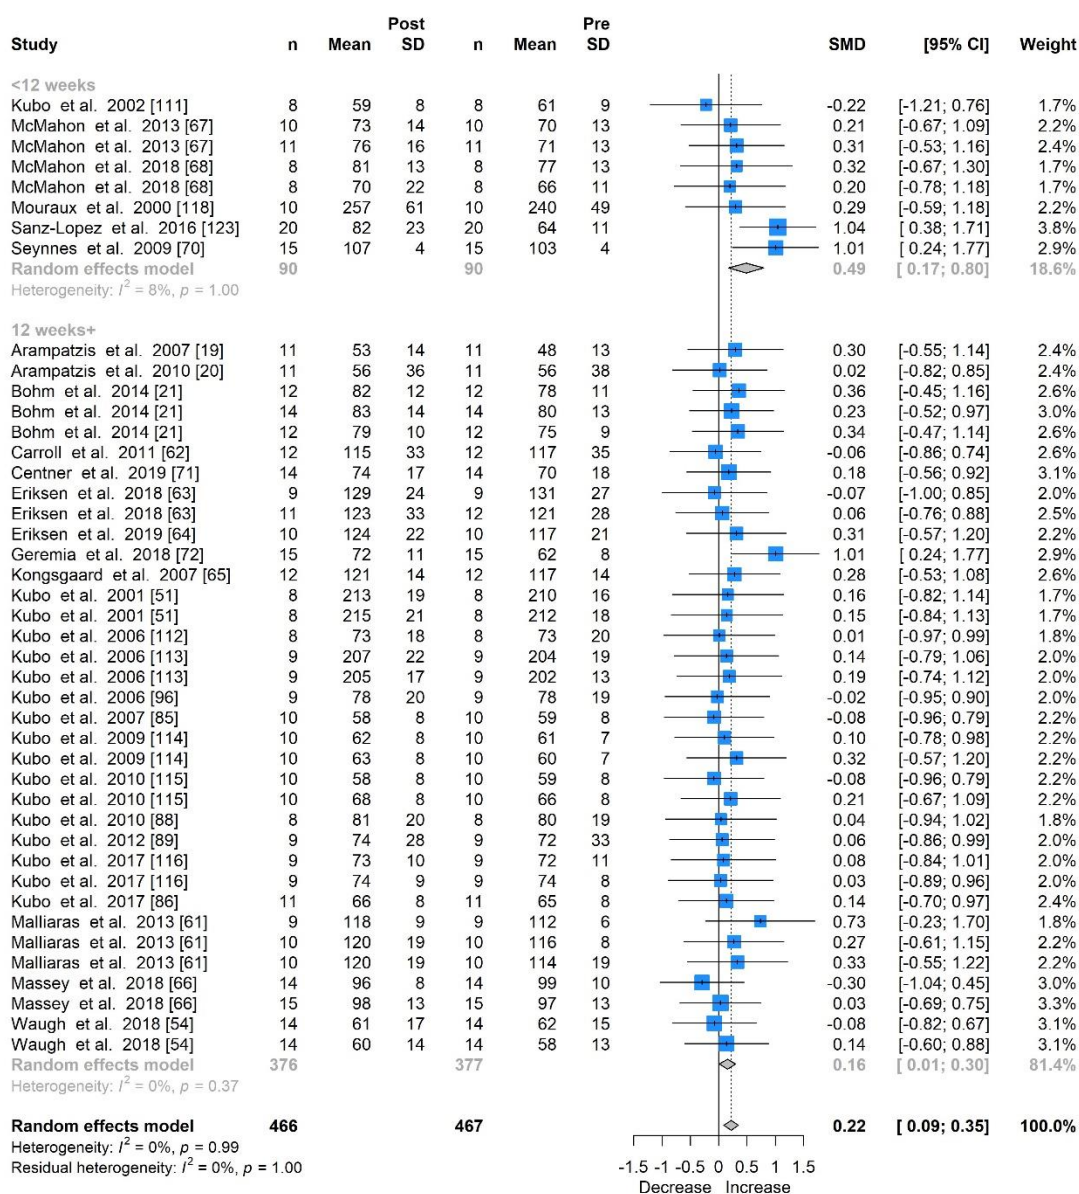

**S23.** Forest plot for the meta-analysis of stiffness subdivided by contraction mode showing standardised mean differences (SMD) and 95% confidence intervals (CI) of high intensity, resistance training studies.

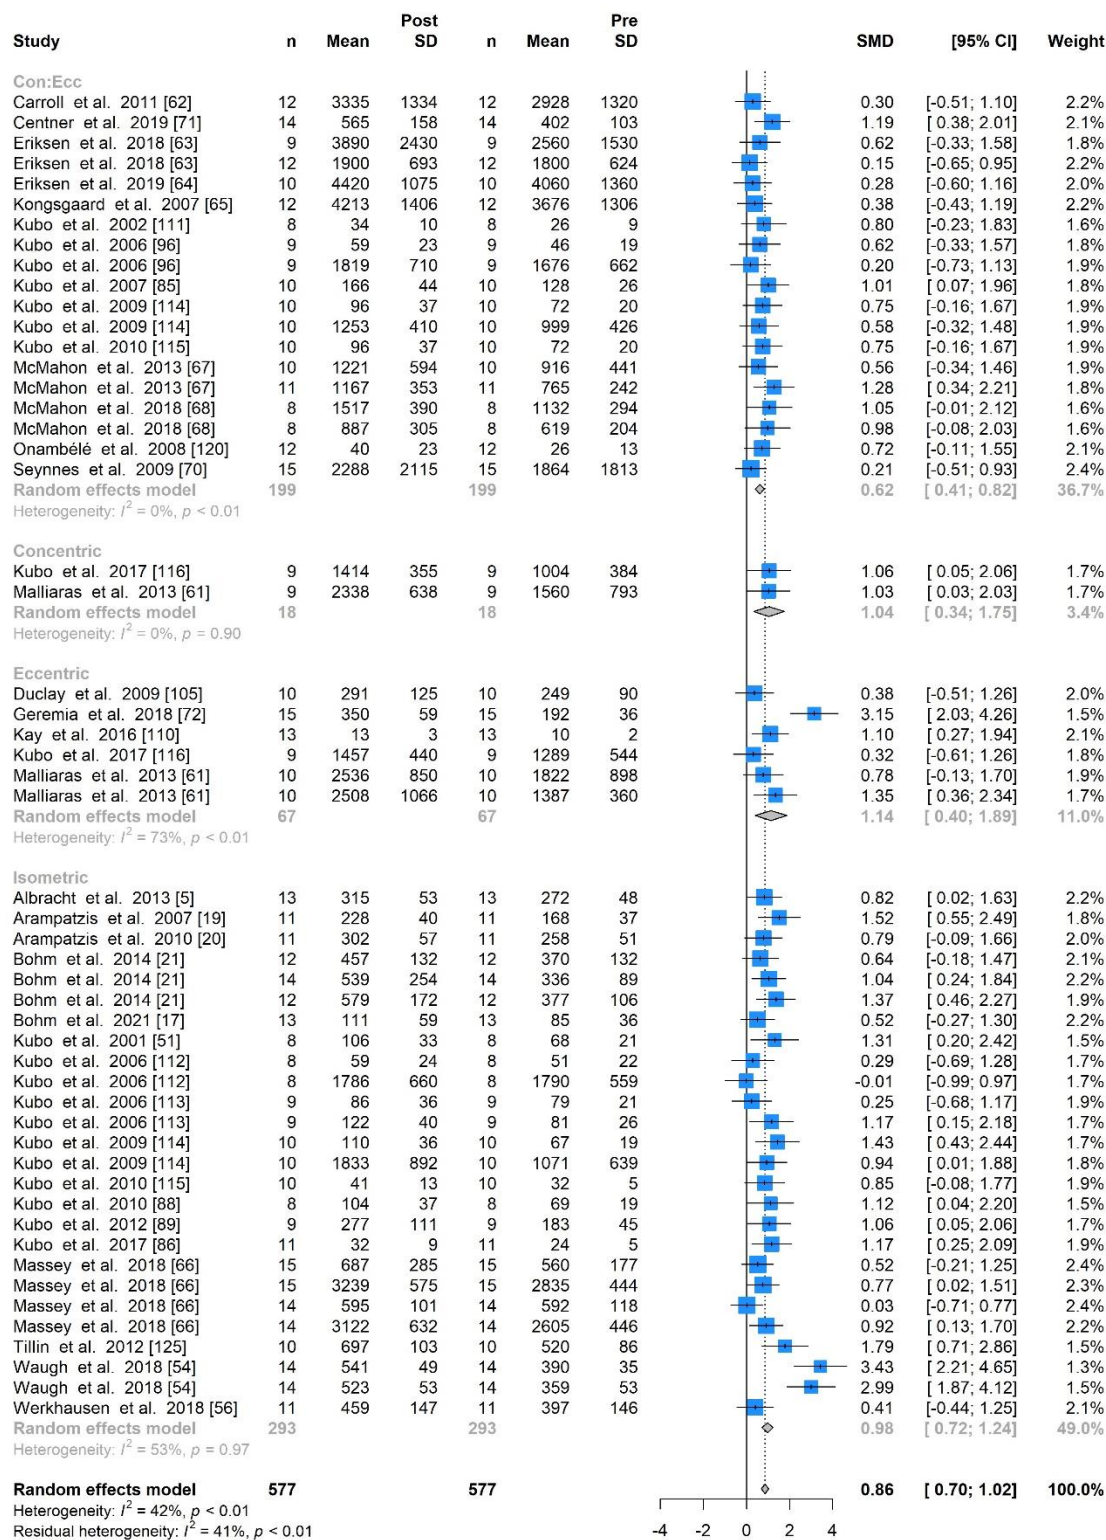

**S24.** Forest plot for the meta-analysis of modulus subdivided by contraction mode showing standardised mean differences (SMD) and 95% confidence intervals (CI) of high intensity, resistance training studies.

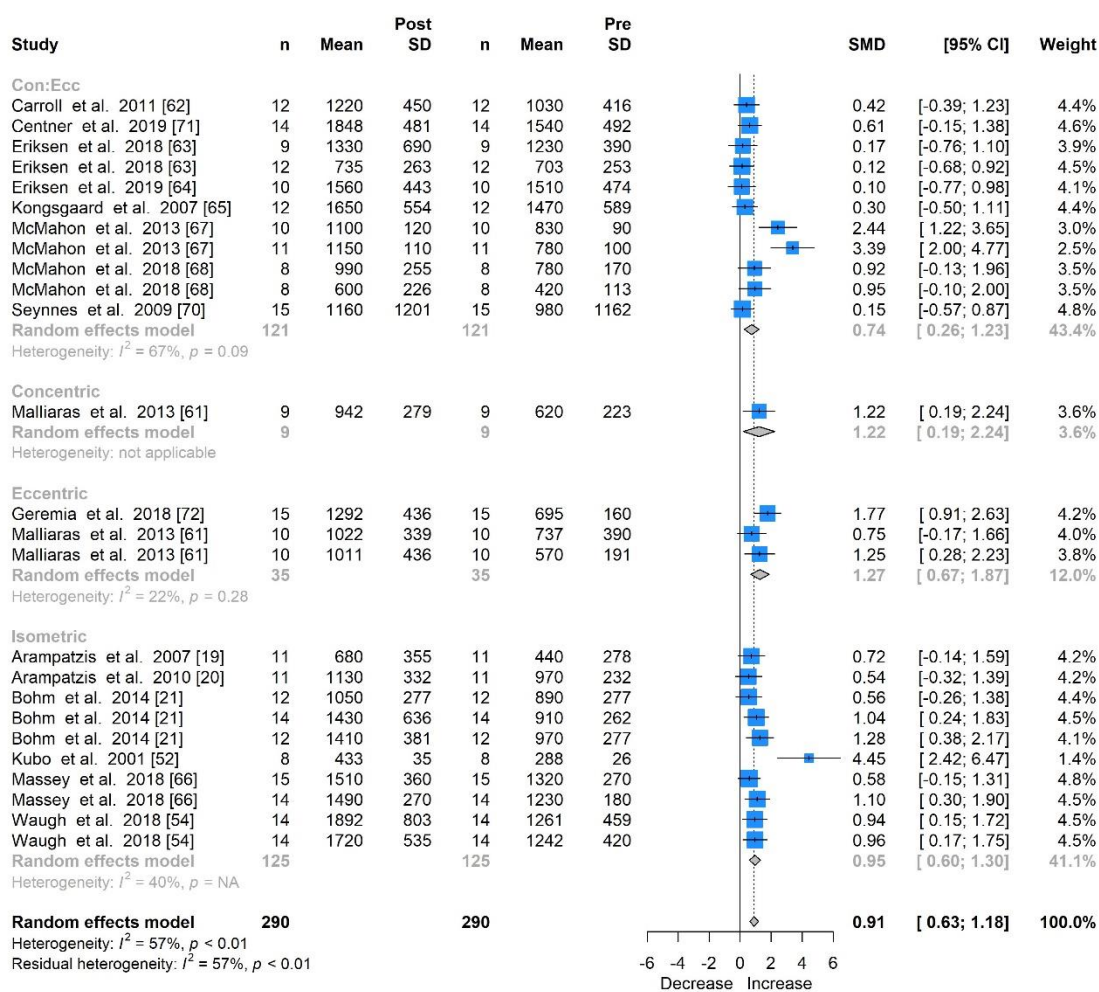



**S25.** Forest plot for the meta-analysis of cross-sectional area subdivided by contraction mode showing standardised mean differences (SMD) and 95% confidence intervals (CI) of high intensity, resistance training studies.

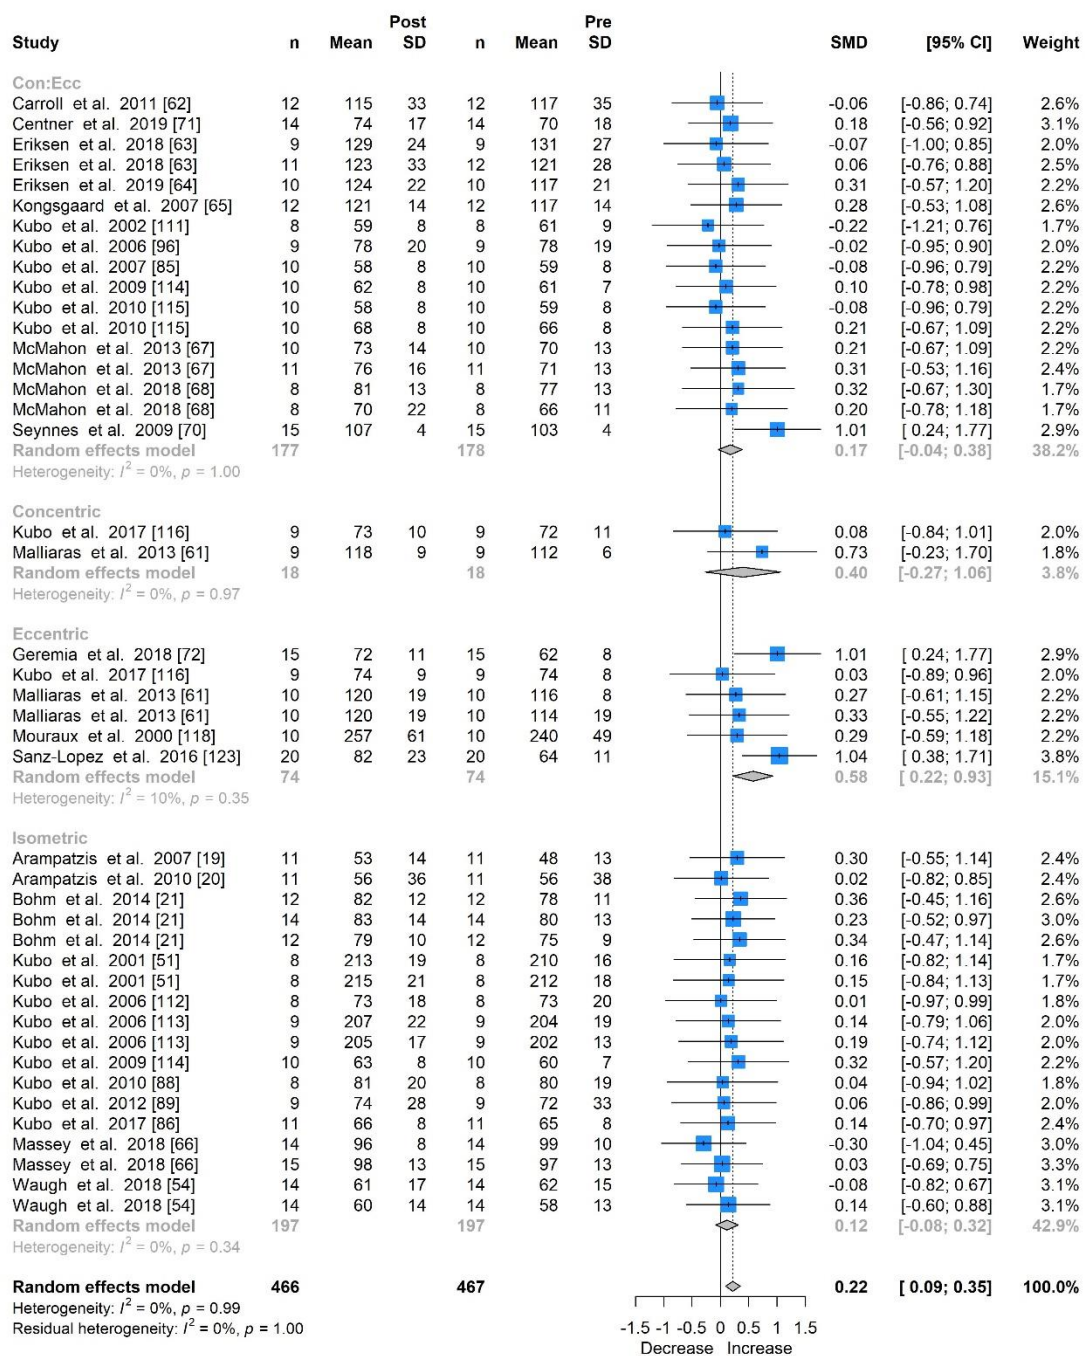



**S26.** Forest plot for the meta-analysis of stiffness subdivided by contraction mode showing standardised mean differences (SMD) and 95% confidence intervals (CI) of matched high intensity, resistance training studies.

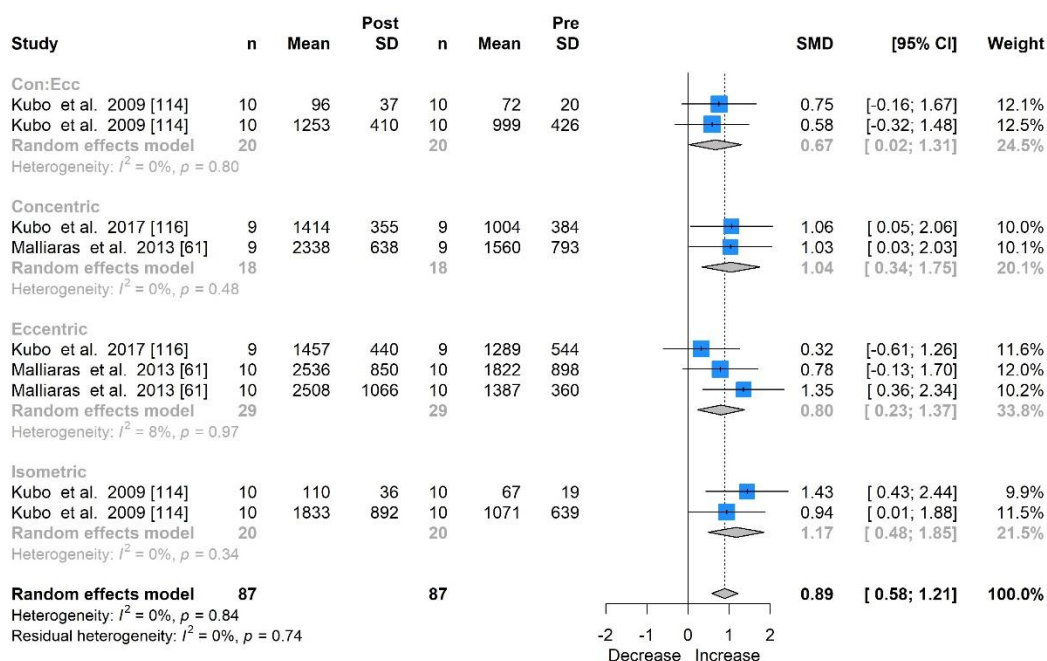

**S27.** Forest plot for the meta-analysis of modulus subdivided by contraction mode showing standardised mean differences (SMD) and 95% confidence intervals (CI) of matched high intensity, resistance training studies.

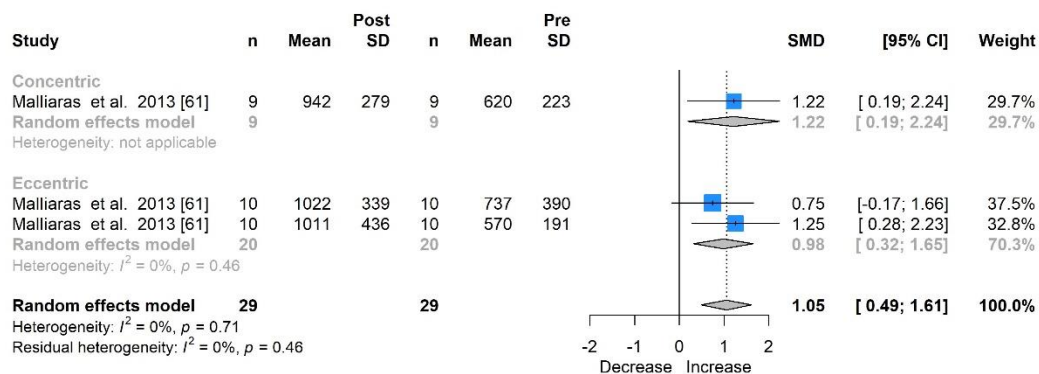

**S28.** Forest plot for the meta-analysis of cross-sectional area subdivided by contraction mode showing standardised mean differences (SMD) and 95% confidence intervals (CI) of matched high intensity, resistance training studies.

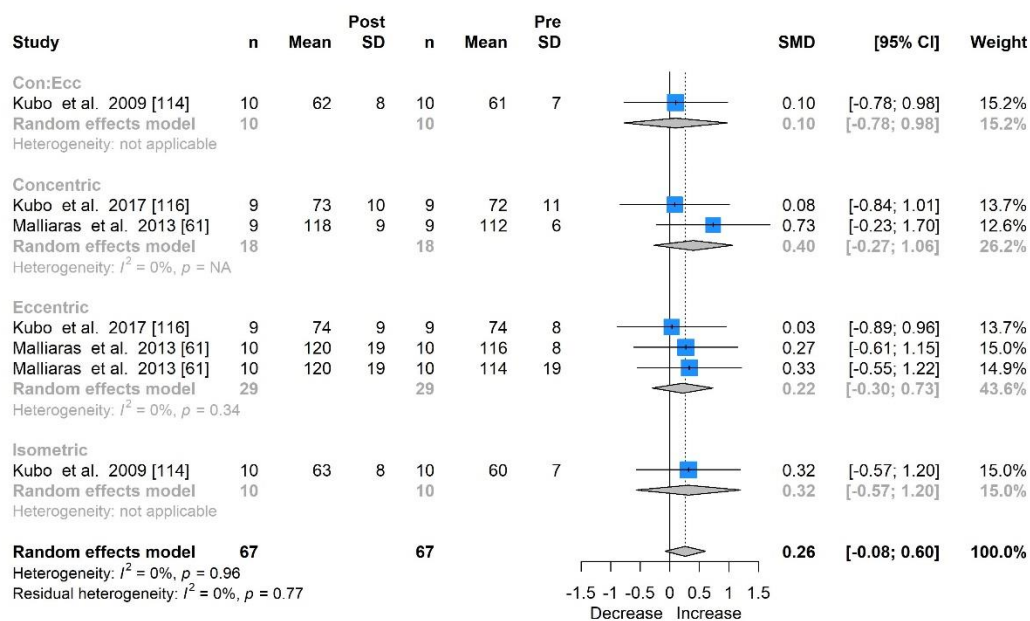

**S29.** Forest plot for the meta-analysis of stiffness subdivided by age group showing standardised mean differences (SMD) and 95% confidence intervals (CI) of high intensity resistance training studies.

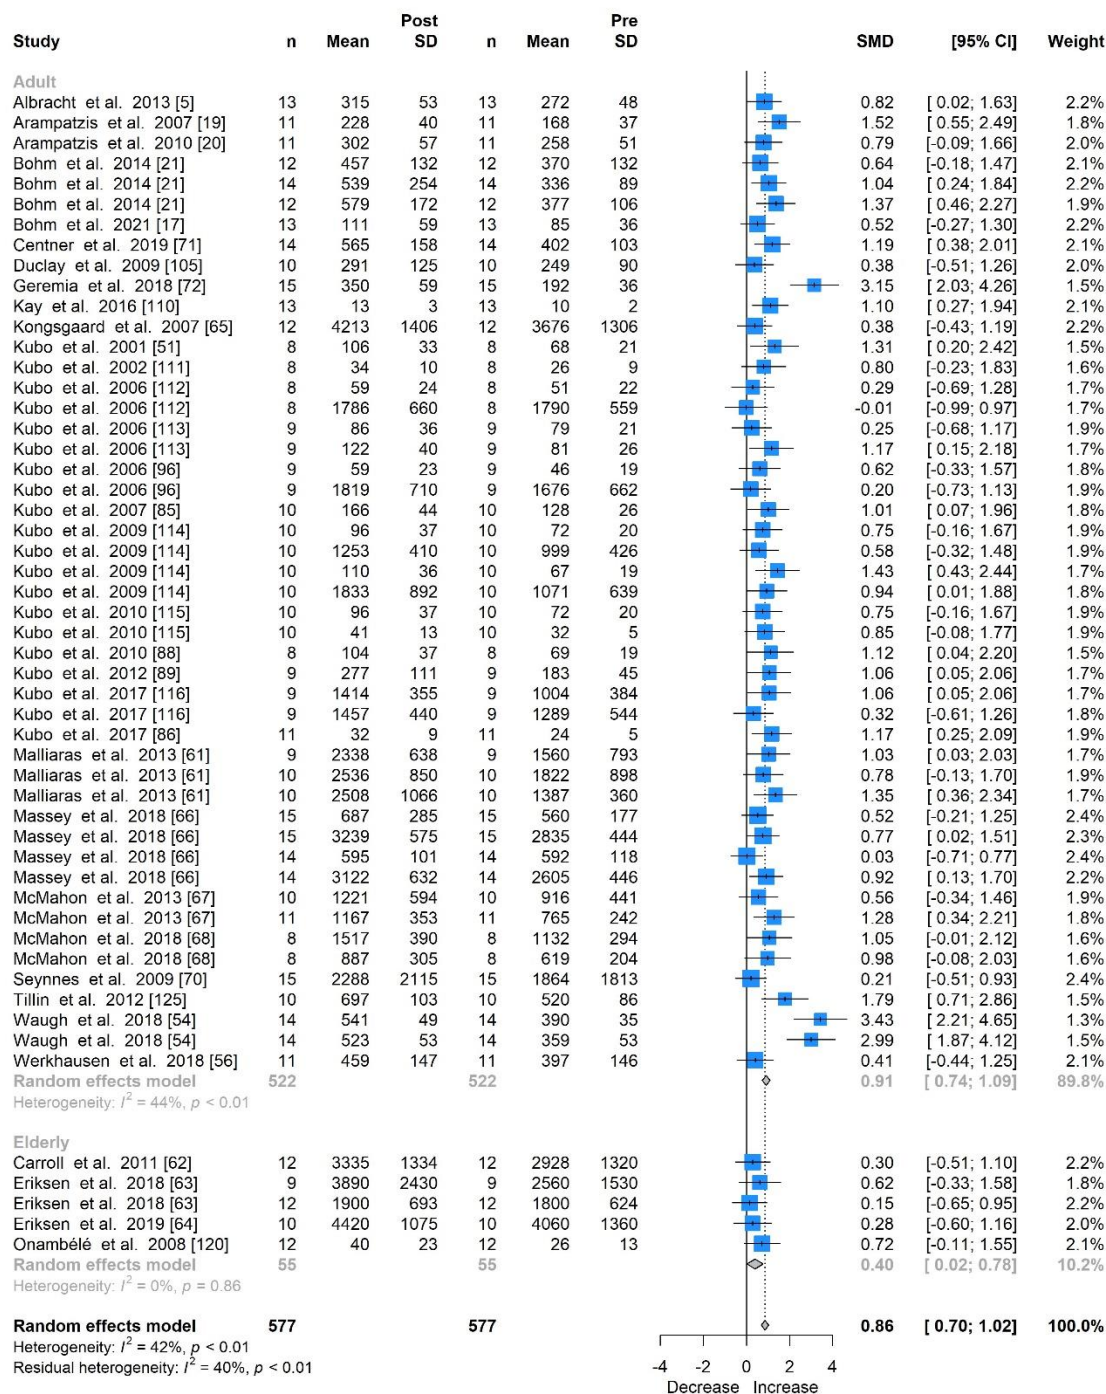

**S30.** Forest plot for the meta-analysis of modulus subdivided by age group showing standardised mean differences (SMD) and 95% confidence intervals (CI) of high intensity resistance training studies.

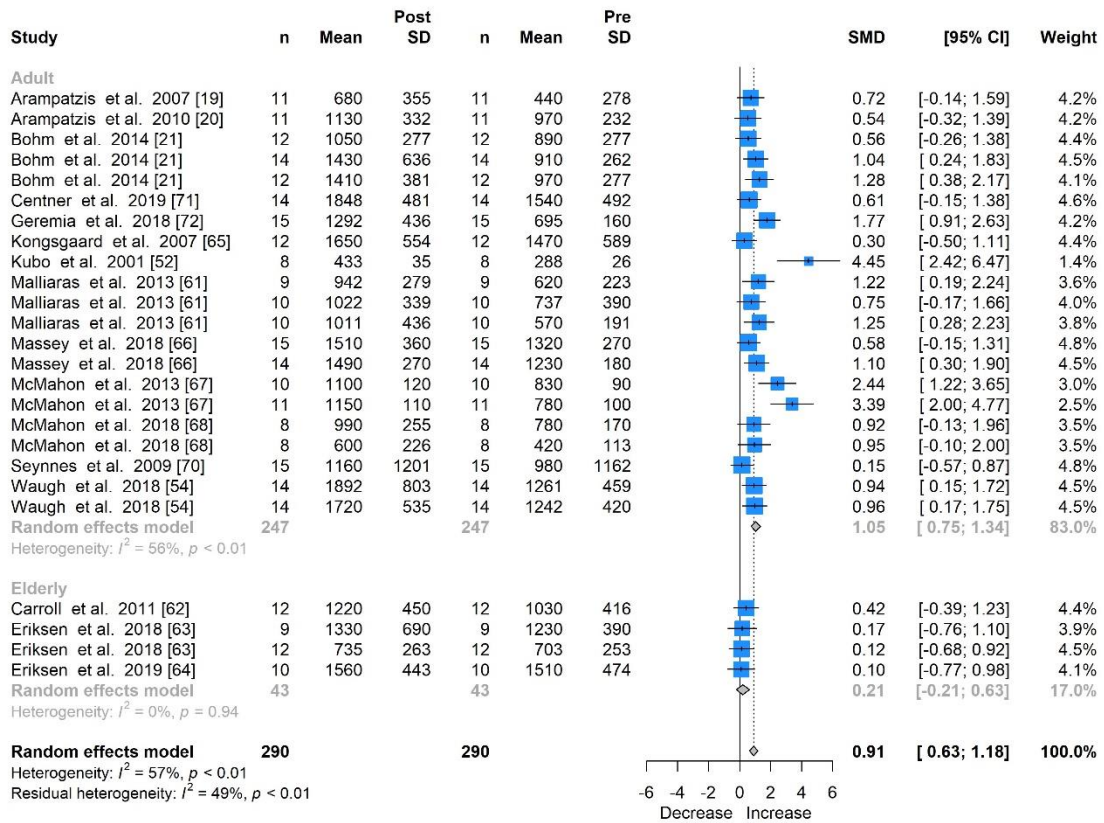



**S31.** Forest plot for the meta-analysis of cross-sectional area subdivided by age group showing standardised mean differences (SMD) and 95% confidence intervals (CI) of high intensity resistance training studies.

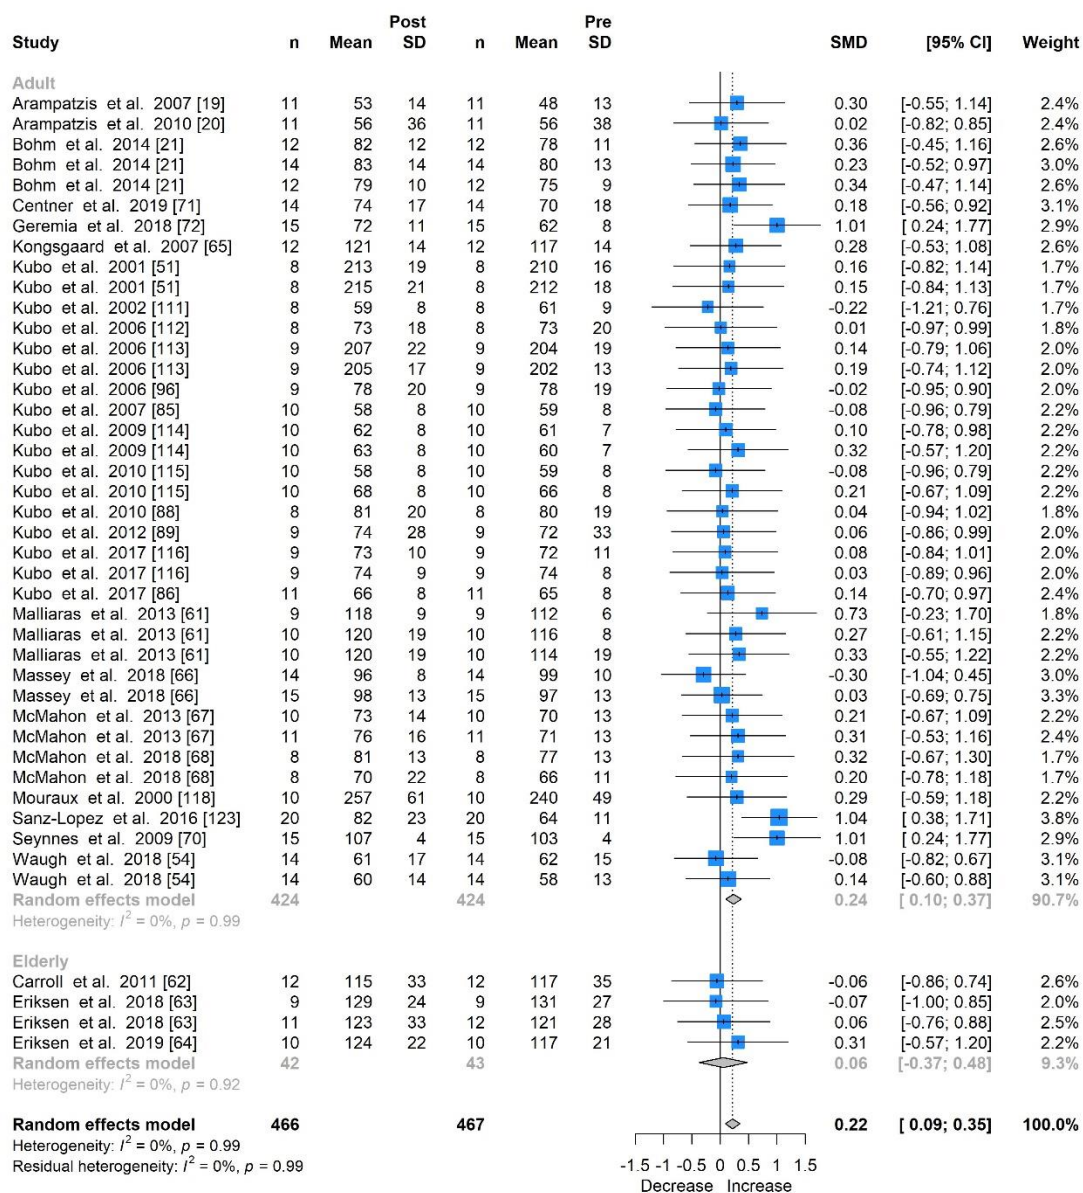

Supplement: 40279_2022_1695_MOESM1_ESM.pdf [file 40279_2022_1695_MOESM1_ESM.pdf]
